# Supplementary material for: Intermediates and shunt products of massiliachelin biosynthesis in Massilia sp. NR 4-1
Source: publisher site journal article supplement (doi:10.3762/bjoc.19.69), 2023-06-23
Supplement: Additional file 1 [file 1860-5397-19-69-S1.pdf]

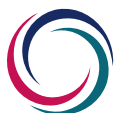

## Supporting Information

for

### Intermediates and shunt products of massiliachelin biosynthesis in *Massilia* sp. NR 4-1

Till Steinmetz, Blaise Kimbadi Lombe and Markus Nett

*Beilstein J. Org. Chem.* **2023**, *19*, 909–917. doi:10.3762/bjoc.19.69

### UV and total ion chromatograms of culture extracts from *Massilia* sp. NR 4-1. Copies of MS/MS and NMR spectra for new compounds

|                                                                                                                                                                          |     |
|--------------------------------------------------------------------------------------------------------------------------------------------------------------------------|-----|
| Table S1: Inhibition zone diameters of <b>1-6</b> against test bacteria.....                                                                                             | S1  |
| Figure S1: UV chromatogram (585 nm) of crude culture extract from <i>Massilia</i> sp. NR 4-1 grown with sodium pyruvate (red) and without sodium pyruvate (black). ..... | S2  |
| Figure S2: UV chromatogram (280 nm) of the crude culture extract from <i>Massilia</i> sp. NR 4-1. ....                                                                   | S3  |
| Figure S3: Total ion chromatogram of the crude culture extract from <i>Massilia</i> sp. NR 4-1 .....                                                                     | S4  |
| Figure S4: MS/MS spectrum of <b>1</b> .....                                                                                                                              | S5  |
| Figure S5: <sup>1</sup> H NMR spectrum of <b>1</b> (600 MHz, DMSO- <i>d</i> <sub>6</sub> , 25 °C) .....                                                                  | S6  |
| Figure S6: <sup>13</sup> C NMR spectrum of <b>1</b> (150 MHz, DMSO- <i>d</i> <sub>6</sub> , 25 °C) .....                                                                 | S7  |
| Figure S7: COSY spectrum of <b>1</b> (600 MHz, DMSO- <i>d</i> <sub>6</sub> , 25 °C) .....                                                                                | S8  |
| Figure S8: HSQC spectrum of <b>1</b> (600 MHz, DMSO- <i>d</i> <sub>6</sub> , 25 °C).....                                                                                 | S9  |
| Figure S9: HMBC spectrum of <b>1</b> (600 MHz, DMSO- <i>d</i> <sub>6</sub> , 25 °C).....                                                                                 | S10 |
| Figure S10: MS/MS spectrum of <b>2</b> .....                                                                                                                             | S11 |
| Figure S11: <sup>1</sup> H NMR spectrum of <b>2</b> (600 MHz, DMSO- <i>d</i> <sub>6</sub> , 25 °C) .....                                                                 | S12 |
| Figure S12: <sup>13</sup> C NMR spectrum of <b>2</b> (150 MHz, DMSO- <i>d</i> <sub>6</sub> , 25 °C) .....                                                                | S13 |
| Figure S13: COSY spectrum of <b>2</b> (600 MHz, DMSO- <i>d</i> <sub>6</sub> , 25 °C) .....                                                                               | S14 |
| Figure S14: HSQC spectrum of <b>2</b> (600 MHz, DMSO- <i>d</i> <sub>6</sub> , 25 °C).....                                                                                | S15 |
| Figure S15: HMBC spectrum of <b>2</b> (600 MHz, DMSO- <i>d</i> <sub>6</sub> , 25 °C).....                                                                                | S16 |
| Figure S16: MS/MS spectrum of <b>3</b> .....                                                                                                                             | S17 |
| Figure S17: <sup>1</sup> H NMR spectrum of <b>3</b> (600 MHz, DMSO- <i>d</i> <sub>6</sub> , 25 °C) .....                                                                 | S18 |
| Figure S18: <sup>13</sup> C NMR spectrum of <b>3</b> (150 MHz, DMSO- <i>d</i> <sub>6</sub> , 25 °C) .....                                                                | S19 |
| Figure S19: COSY spectrum of <b>3</b> (600 MHz, DMSO- <i>d</i> <sub>6</sub> , 25 °C) .....                                                                               | S20 |
| Figure S20: HSQC spectrum of <b>3</b> (600 MHz, DMSO- <i>d</i> <sub>6</sub> , 25 °C).....                                                                                | S21 |
| Figure S21: HMBC spectrum of <b>3</b> (600 MHz, DMSO- <i>d</i> <sub>6</sub> , 25 °C).....                                                                                | S22 |
| Figure S22: MS/MS spectrum of <b>4</b> .....                                                                                                                             | S23 |
| Figure S23: <sup>1</sup> H NMR spectrum of <b>4</b> (600 MHz, DMSO- <i>d</i> <sub>6</sub> , 25 °C) .....                                                                 | S24 |
| Figure S24: <sup>13</sup> C NMR spectrum of <b>4</b> (150 MHz, DMSO- <i>d</i> <sub>6</sub> , 25 °C) .....                                                                | S25 |
| Figure S25: COSY spectrum of <b>4</b> (600 MHz, DMSO- <i>d</i> <sub>6</sub> , 25 °C) .....                                                                               | S26 |
| Figure S26: HSQC spectrum of <b>4</b> (600 MHz, DMSO- <i>d</i> <sub>6</sub> , 25 °C).....                                                                                | S27 |
| Figure S27: HMBC spectrum of <b>4</b> (600 MHz, DMSO- <i>d</i> <sub>6</sub> , 25 °C).....                                                                                | S28 |
| Figure S28: MS/MS spectrum of <b>5</b> .....                                                                                                                             | S29 |
| Figure S29: <sup>1</sup> H NMR spectrum of <b>5</b> (600 MHz, DMSO- <i>d</i> <sub>6</sub> , 25 °C) .....                                                                 | S30 |
| Figure S30: <sup>13</sup> C NMR spectrum of <b>5</b> (150 MHz, DMSO- <i>d</i> <sub>6</sub> , 25 °C) .....                                                                | S31 |
| Figure S31: COSY spectrum of <b>5</b> (600 MHz, DMSO- <i>d</i> <sub>6</sub> , 25 °C) .....                                                                               | S32 |
| Figure S32: HSQC spectrum of <b>5</b> (600 MHz, DMSO- <i>d</i> <sub>6</sub> , 25 °C).....                                                                                | S33 |
| Figure S33: HMBC spectrum of <b>5</b> (600 MHz, DMSO- <i>d</i> <sub>6</sub> , 25 °C).....                                                                                | S34 |
| Figure S34: MS/MS spectrum of <b>6</b> .....                                                                                                                             | S35 |
| Figure S35: <sup>1</sup> H NMR spectrum of <b>6</b> (600 MHz, DMSO- <i>d</i> <sub>6</sub> , 25 °C) .....                                                                 | S36 |
| Figure S36: <sup>13</sup> C NMR spectrum of <b>6</b> (150 MHz, DMSO- <i>d</i> <sub>6</sub> , 25 °C) .....                                                                | S37 |
| Figure S37: COSY spectrum of <b>6</b> (600 MHz, DMSO- <i>d</i> <sub>6</sub> , 25 °C) .....                                                                               | S38 |
| Figure S38: HSQC spectrum of <b>6</b> (600 MHz, DMSO- <i>d</i> <sub>6</sub> , 25 °C).....                                                                                | S39 |
| Figure S39: HMBC spectrum of <b>6</b> (600 MHz, DMSO- <i>d</i> <sub>6</sub> , 25 °C).....                                                                                | S40 |

Table S1: Inhibition zone diameters of **1-6** as well as the reference antibiotics ampicillin (amp), tetracycline (tet) and ciprofloxacin (cip) against the tested bacteria.

|                      | <b>Diameter of Inhibition Zone (mm)<br/>in 10 yL/disk</b> |                               |                                      |                                |
|----------------------|-----------------------------------------------------------|-------------------------------|--------------------------------------|--------------------------------|
|                      | <i>B. subtilis</i><br>(DSM 168)                           | <i>E. coli</i><br>(DSM 18039) | <i>P. fluorescens</i><br>(DSM 11532) | <i>A. tumefaciens</i><br>(C58) |
| <b>1</b>             | 2                                                         | -                             | -                                    | 1                              |
| <b>2</b>             | -                                                         | -                             | -                                    | -                              |
| <b>3</b>             | 4                                                         | -                             | -                                    | 2                              |
| <b>4</b>             | 3                                                         | -                             | -                                    | -                              |
| <b>5</b>             | 3                                                         | -                             | -                                    | -                              |
| <b>6</b>             | 0.5                                                       | -                             | -                                    | 0.5                            |
| <b>ampicillin</b>    | 14                                                        | 22                            | -                                    | 22                             |
| <b>tetracycline</b>  | 22                                                        | 20                            | 16                                   | 11                             |
| <b>ciprofloxacin</b> | 37                                                        | 38                            | 24                                   | 31                             |

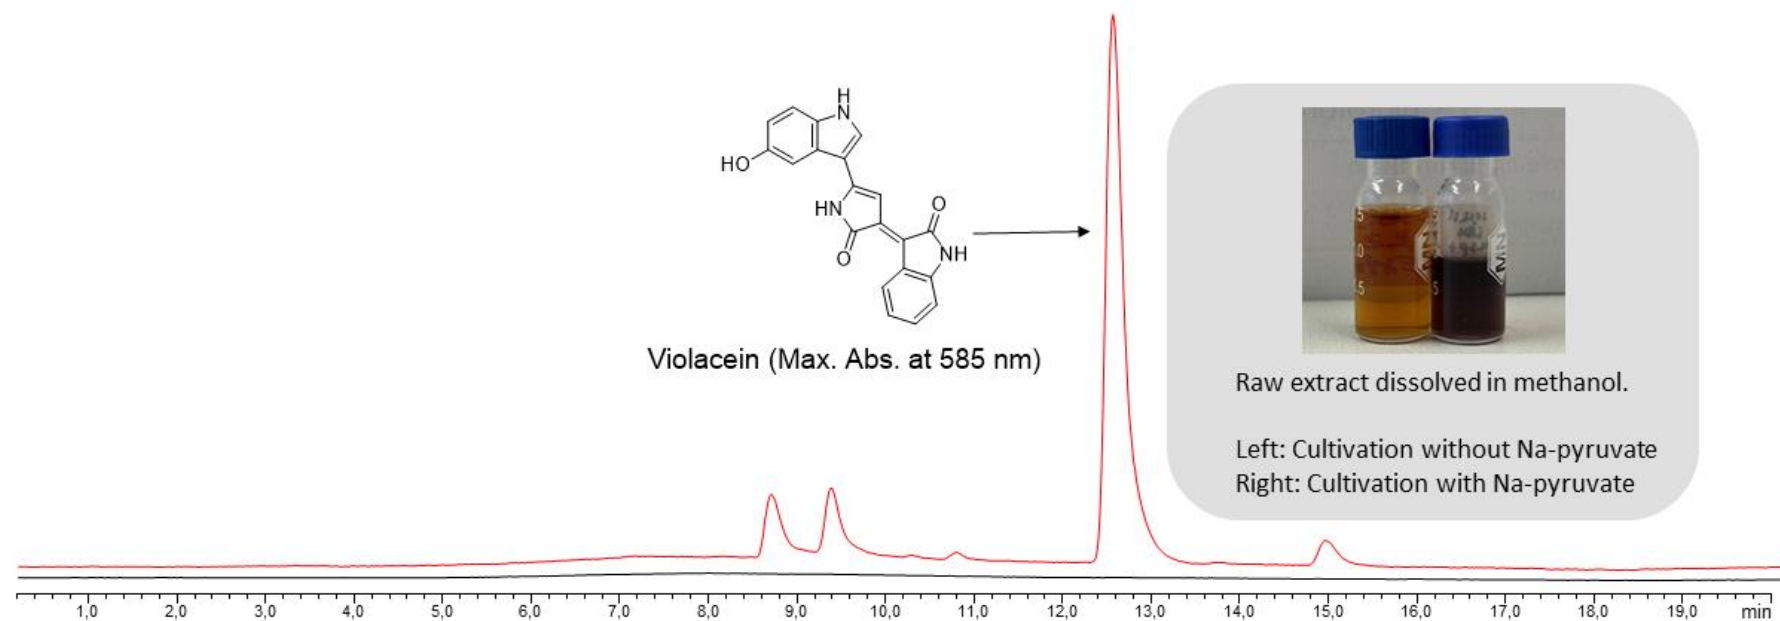

Figure S1: UV chromatogram (585 nm) of crude culture extract from *Massilia* sp. NR 4-1 grown with sodium pyruvate (red) and without sodium pyruvate (black). The darker coloring of the raw extract is due to a higher concentration of violacein.

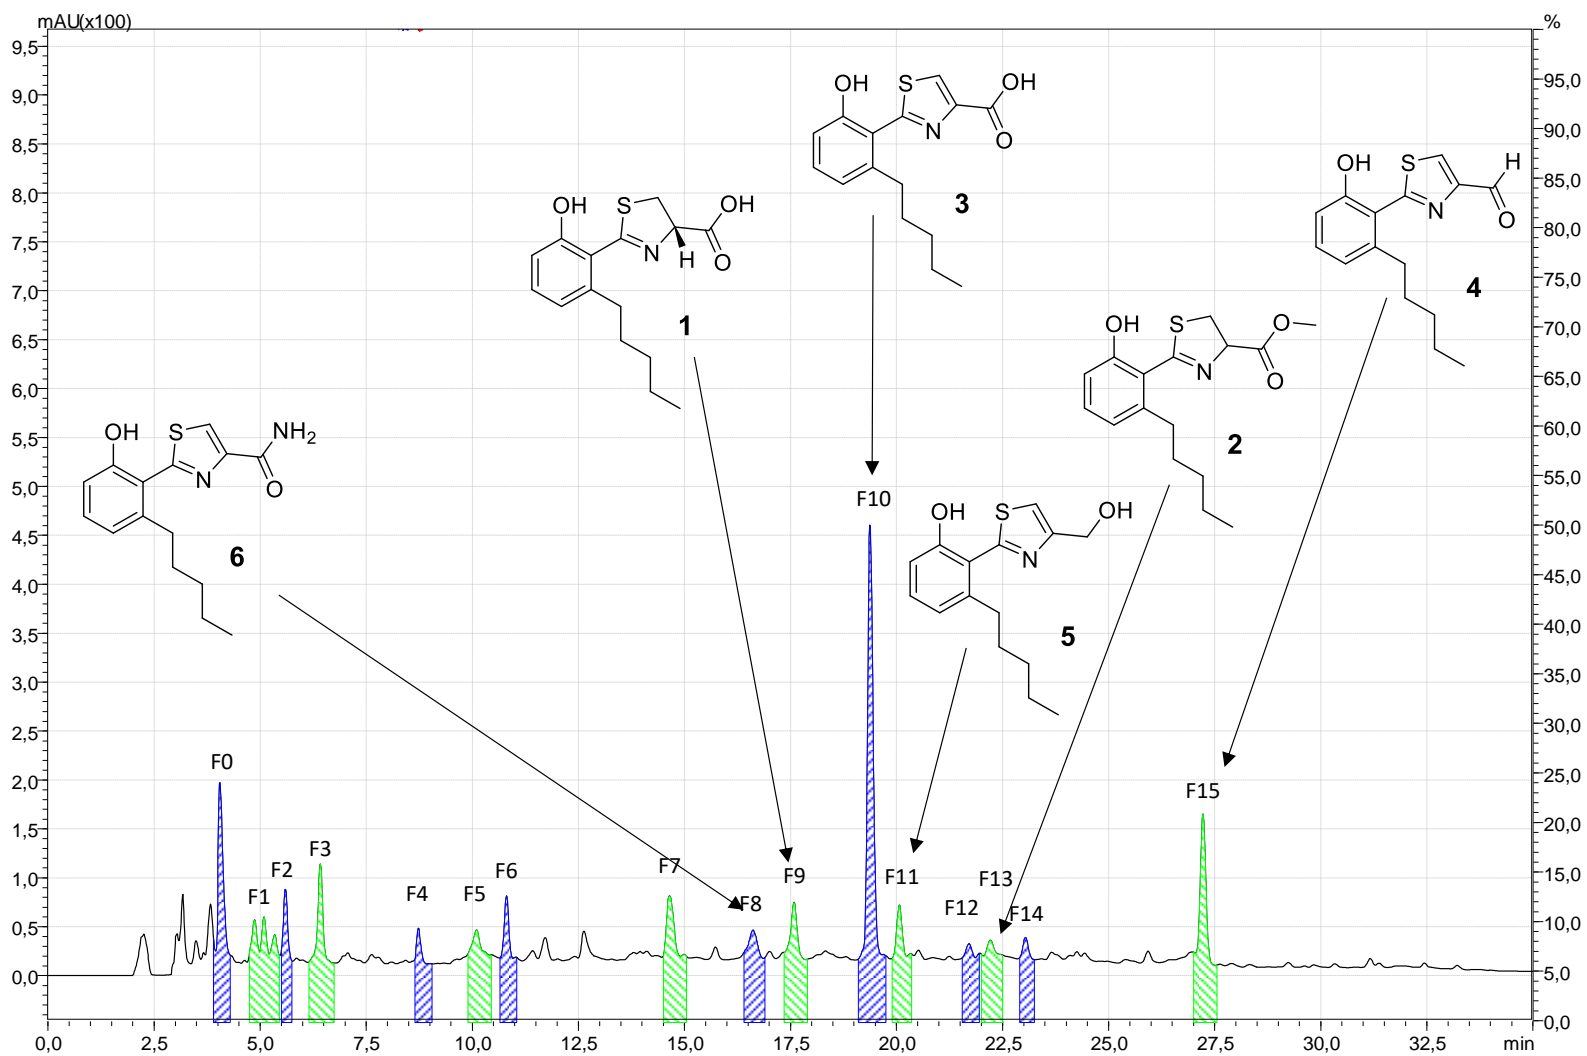

Figure S2: UV chromatogram (280 nm) of the crude culture extract from *Massilia* sp. NR 4-1. Fractions 8, 9, 10, 11, 13, and 15 showed a visible color change with the CAS assay from blue to yellow.

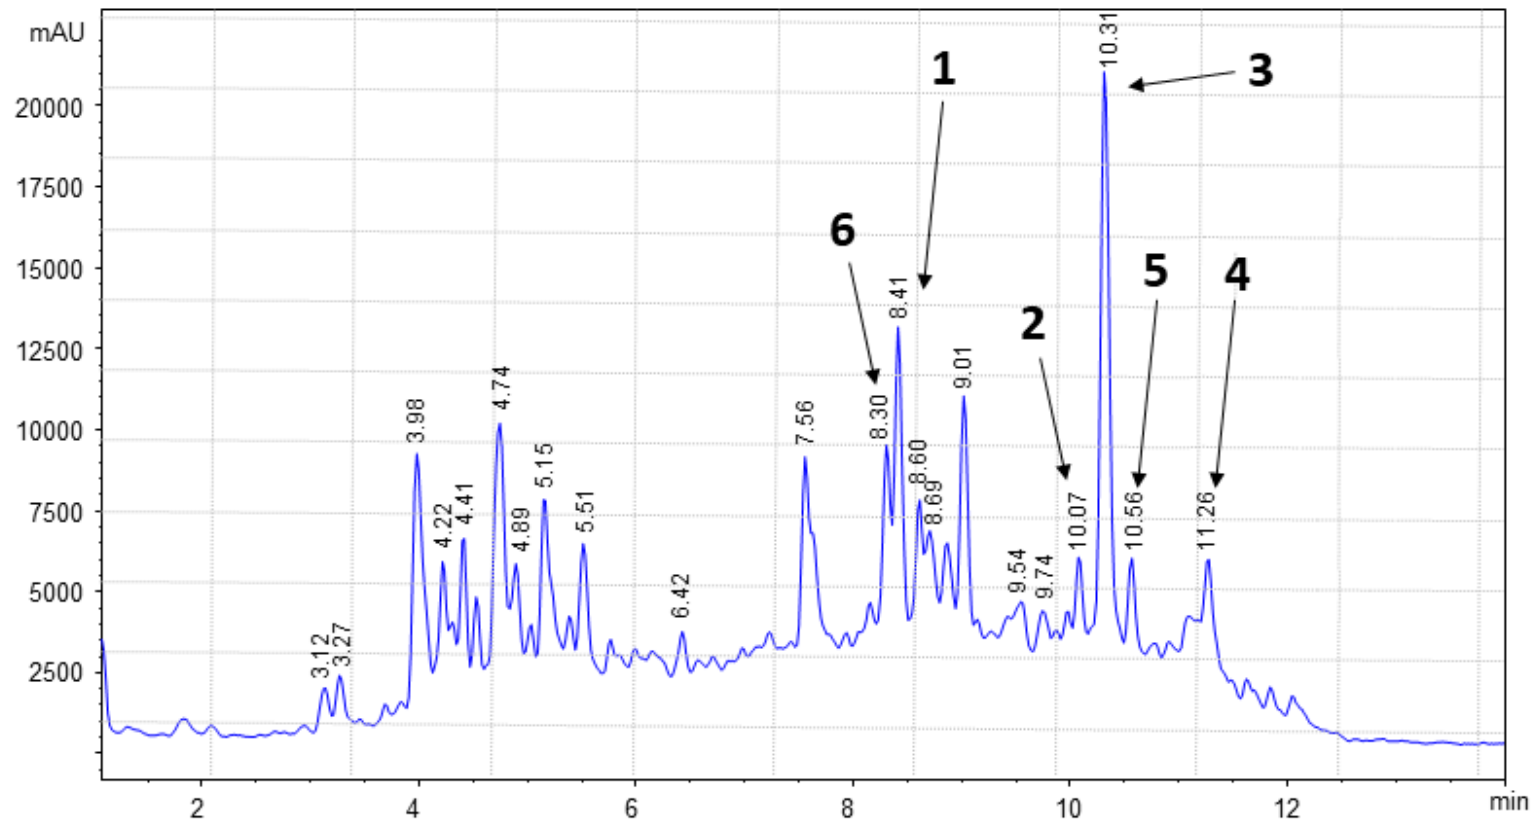

Figure S3: Total ion chromatogram of the crude culture extract from *Massilia sp.* NR 4-1.

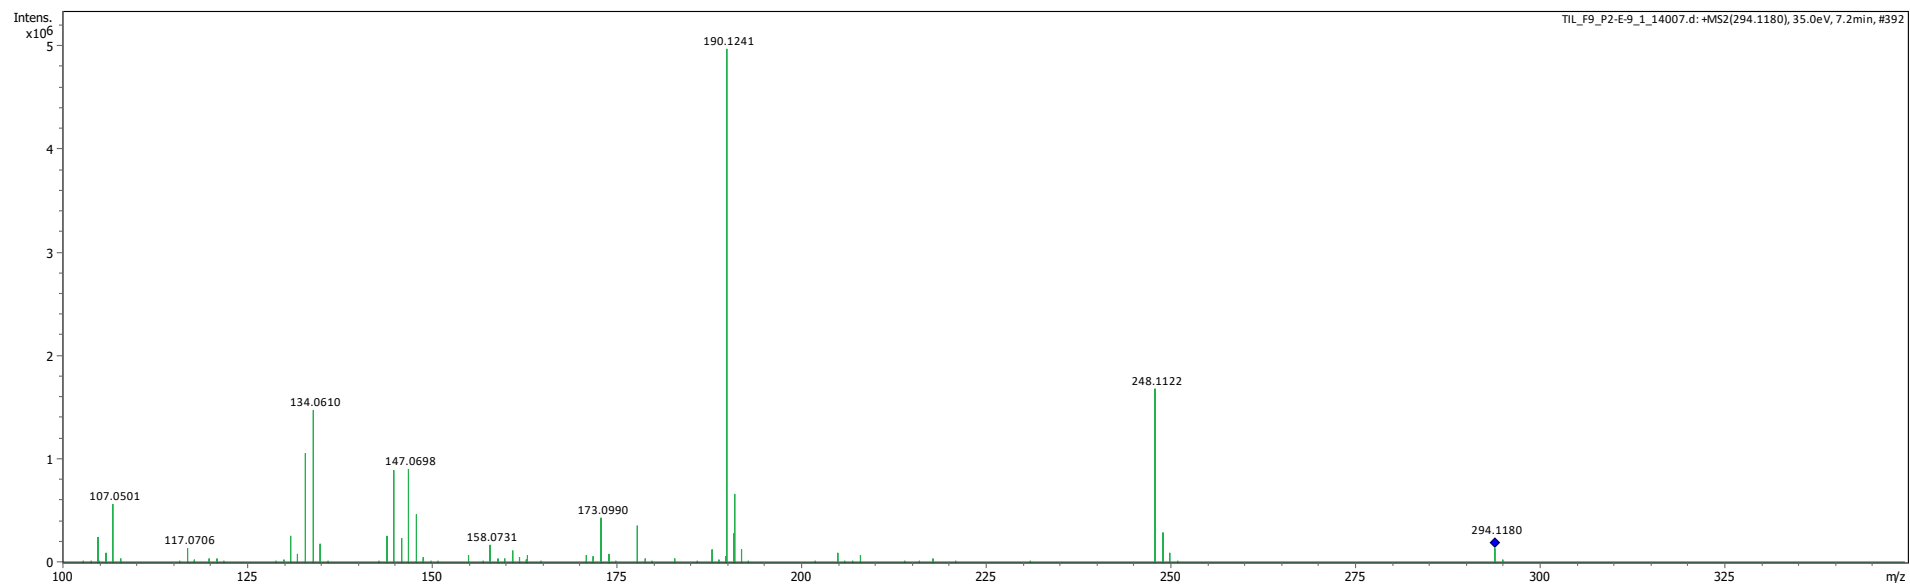

Figure S1: MS/MS spectrum of **1**

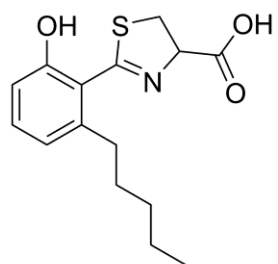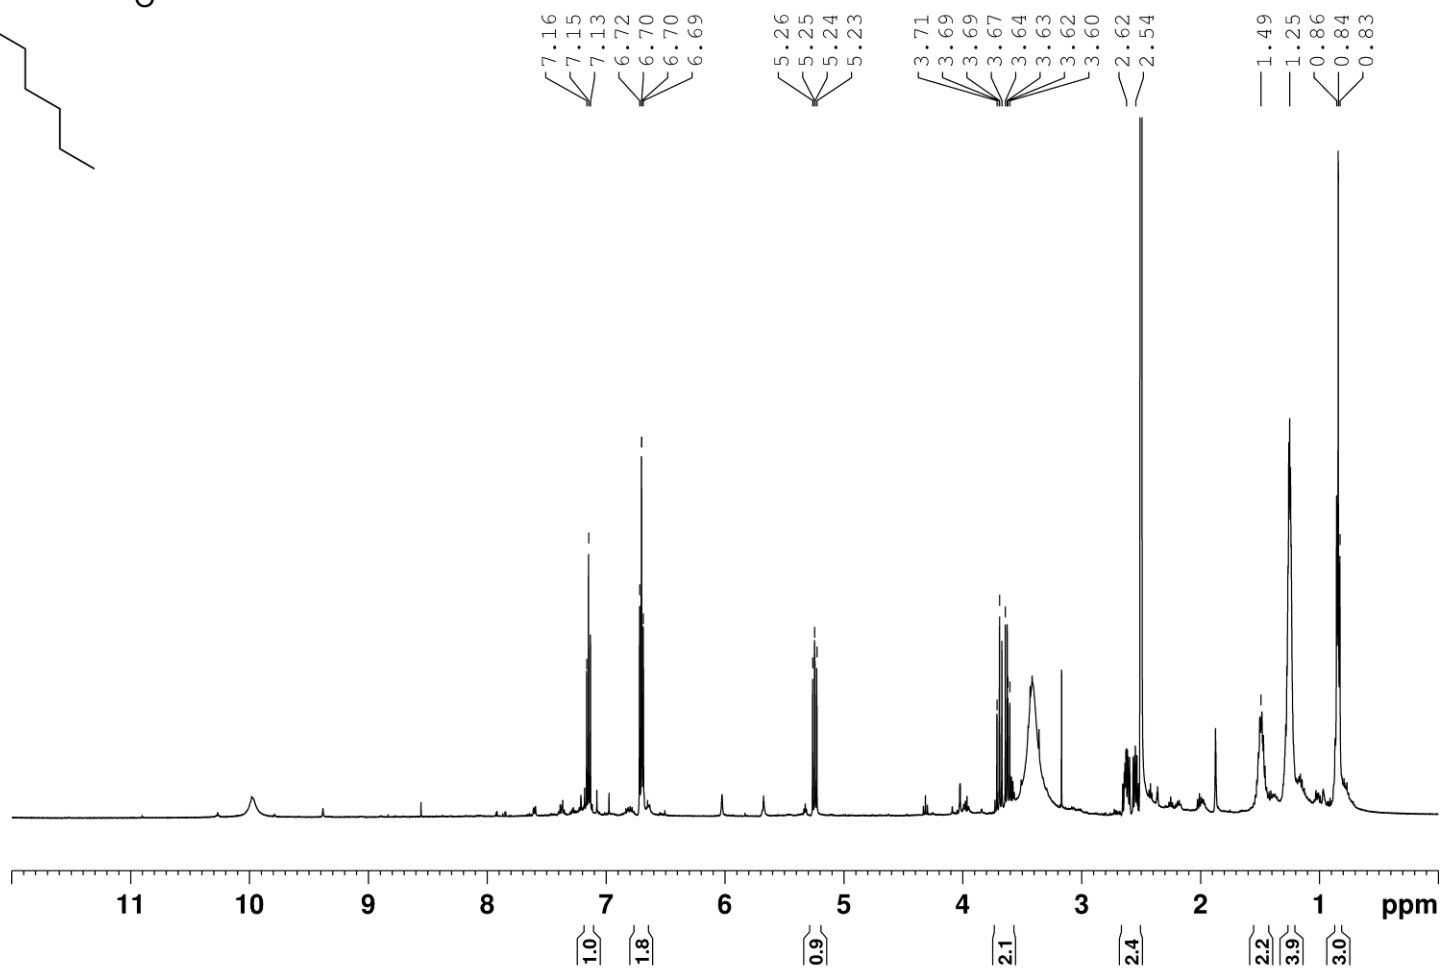

Figure S2: <sup>1</sup>H NMR spectrum of **1** (600 MHz, DMSO-*d*<sub>6</sub>, 25 °C)



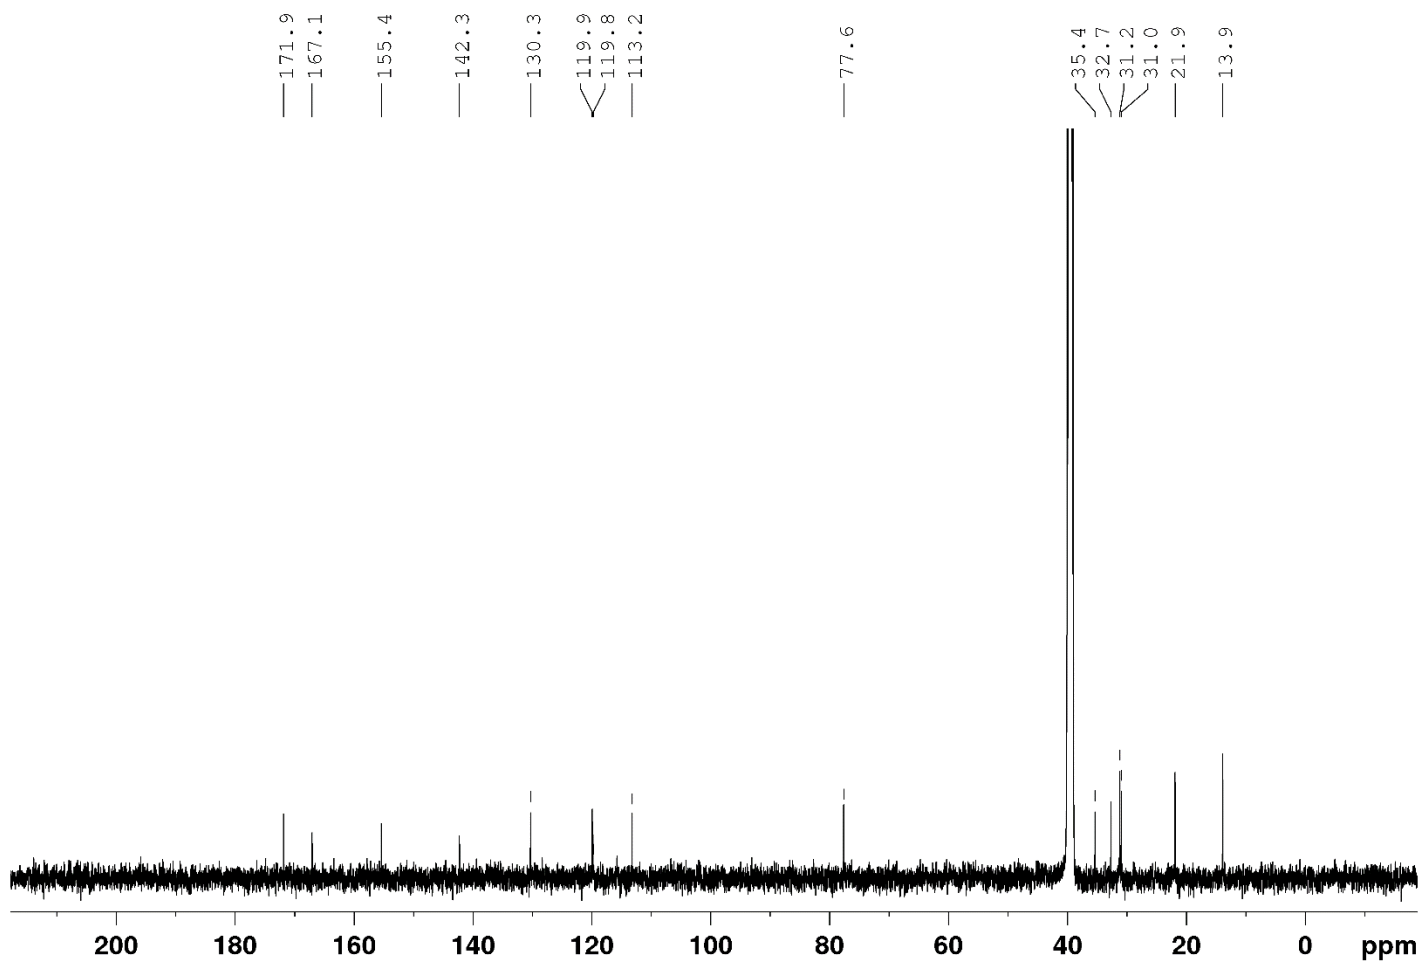

Figure S3:  $^{13}\text{C}$  NMR spectrum of **1** (150 MHz,  $\text{DMSO-}d_6$ , 25 °C)

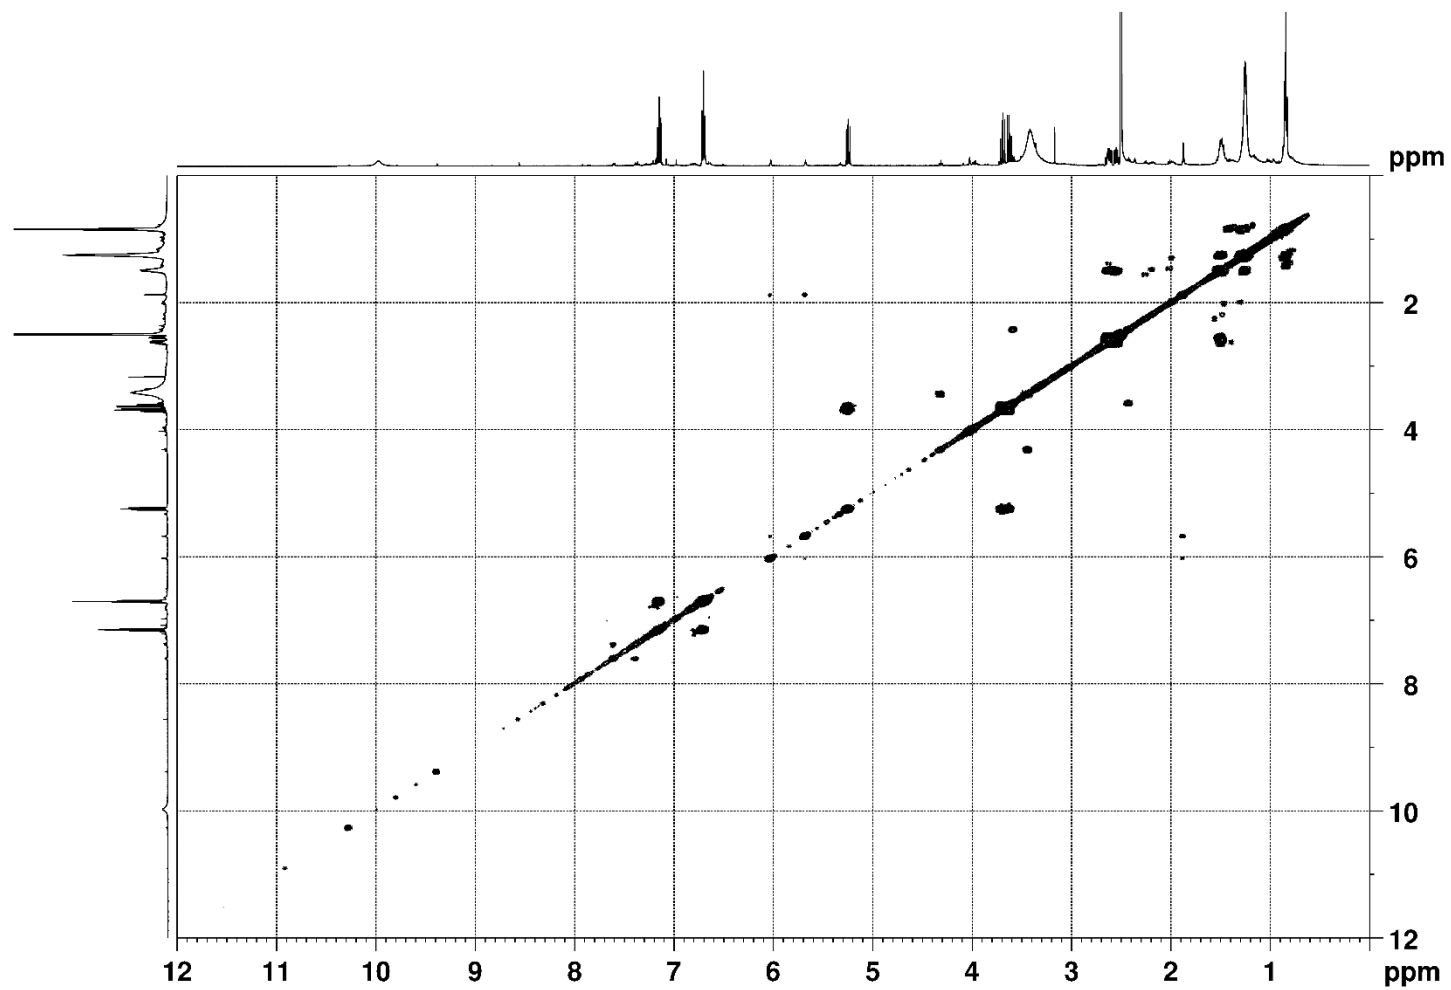

Figure S4: COSY spectrum of **1** (600 MHz, DMSO-*d*<sub>6</sub>, 25 °C)

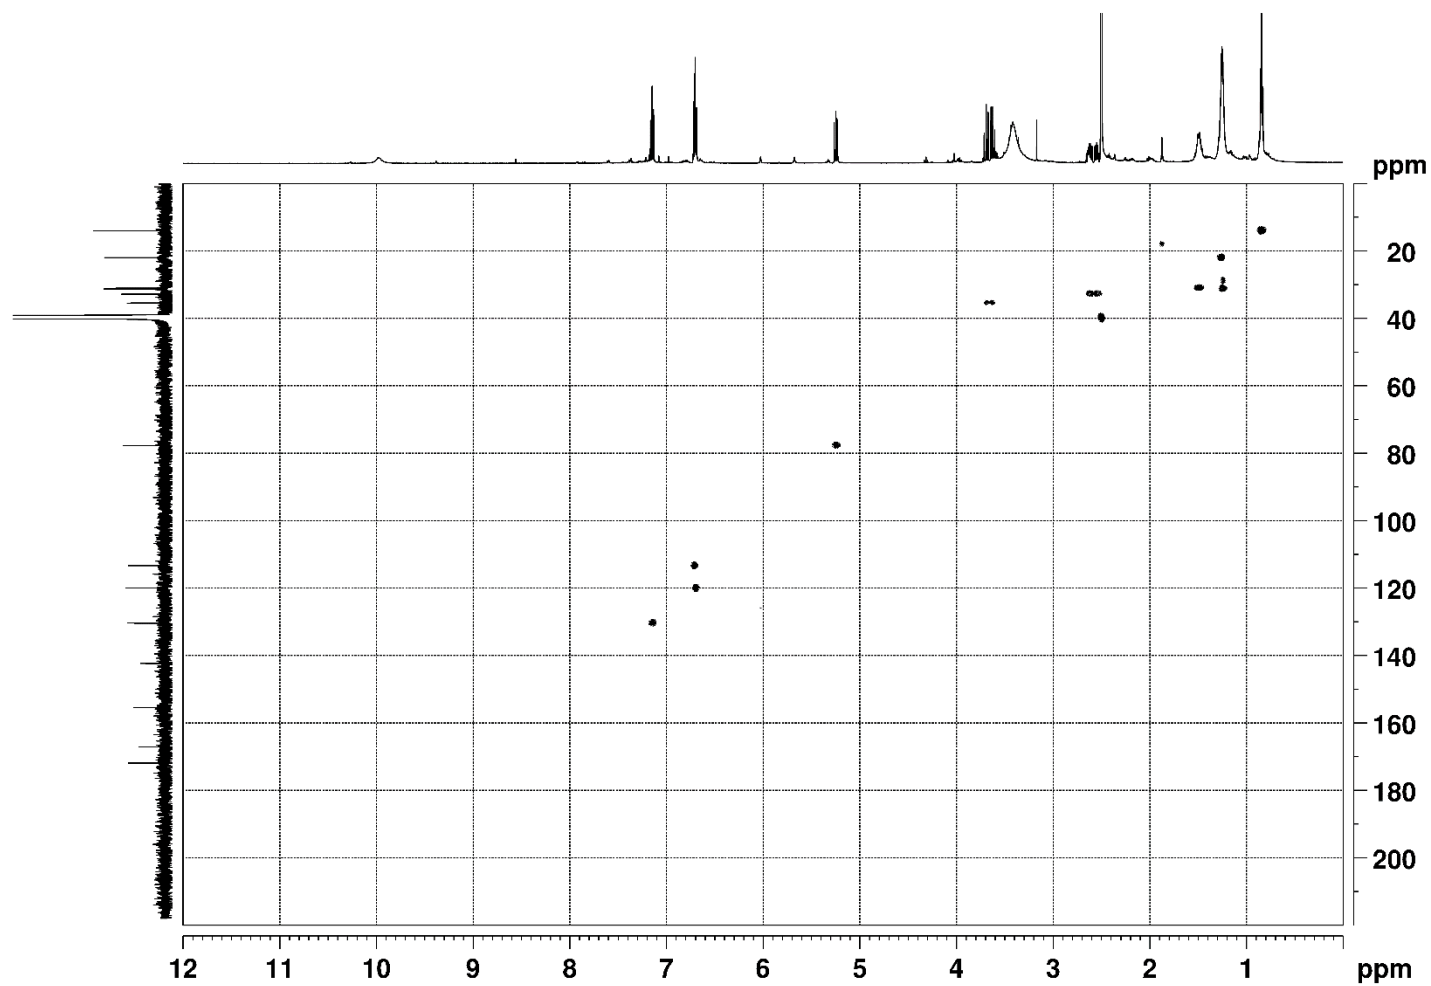

Figure S5: HSQC spectrum of **1** (600 MHz, DMSO- $d_6$ , 25 °C)

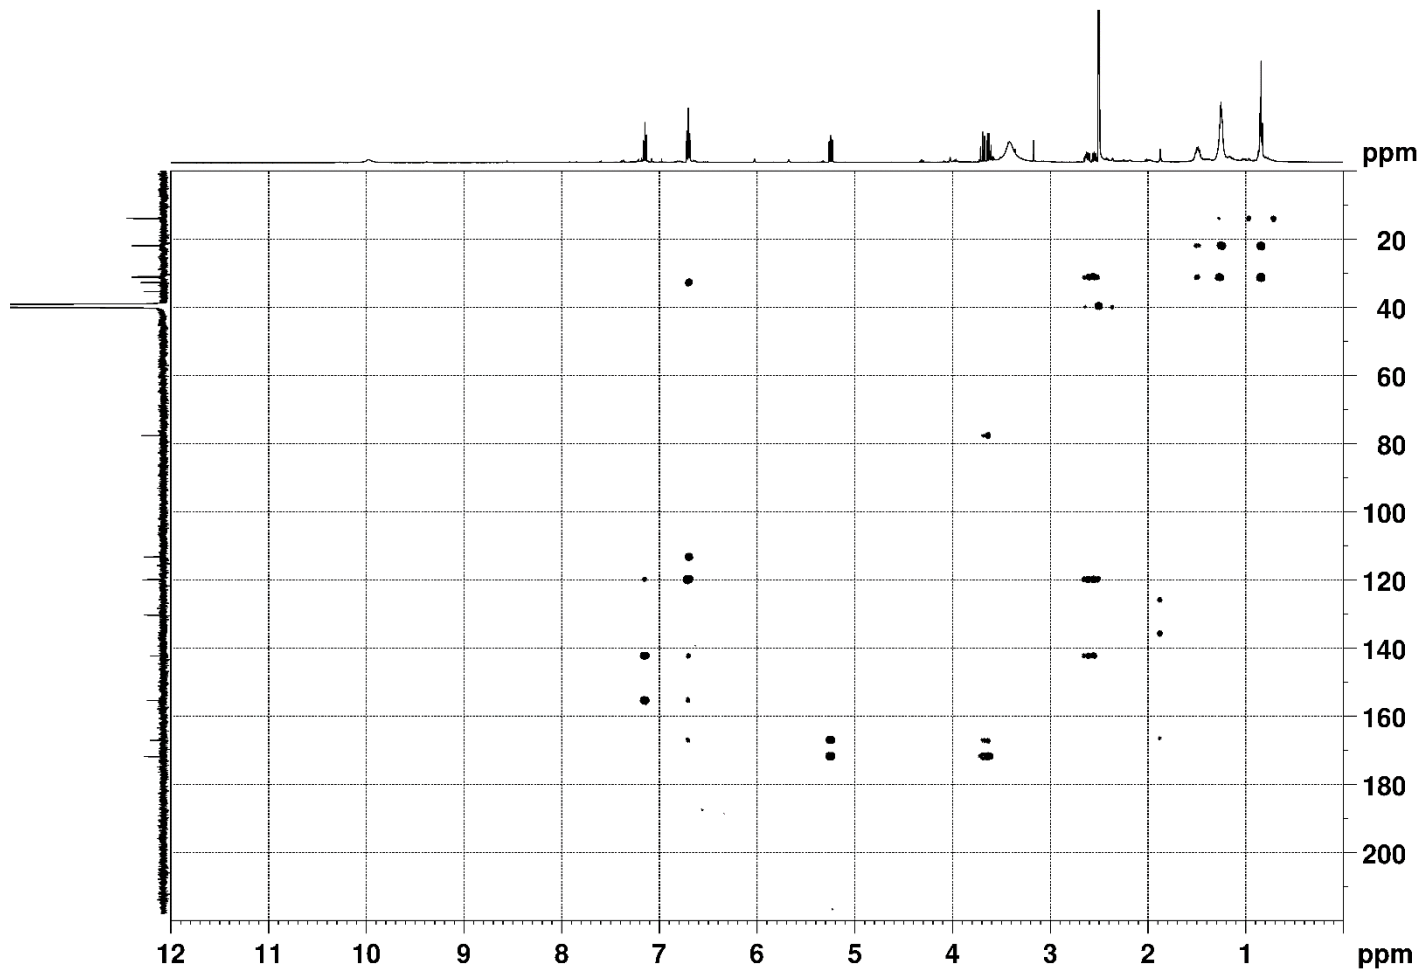

Figure S6: HMBC spectrum of **1** (600 MHz,  $\text{DMSO}-d_6$ , 25 °C)

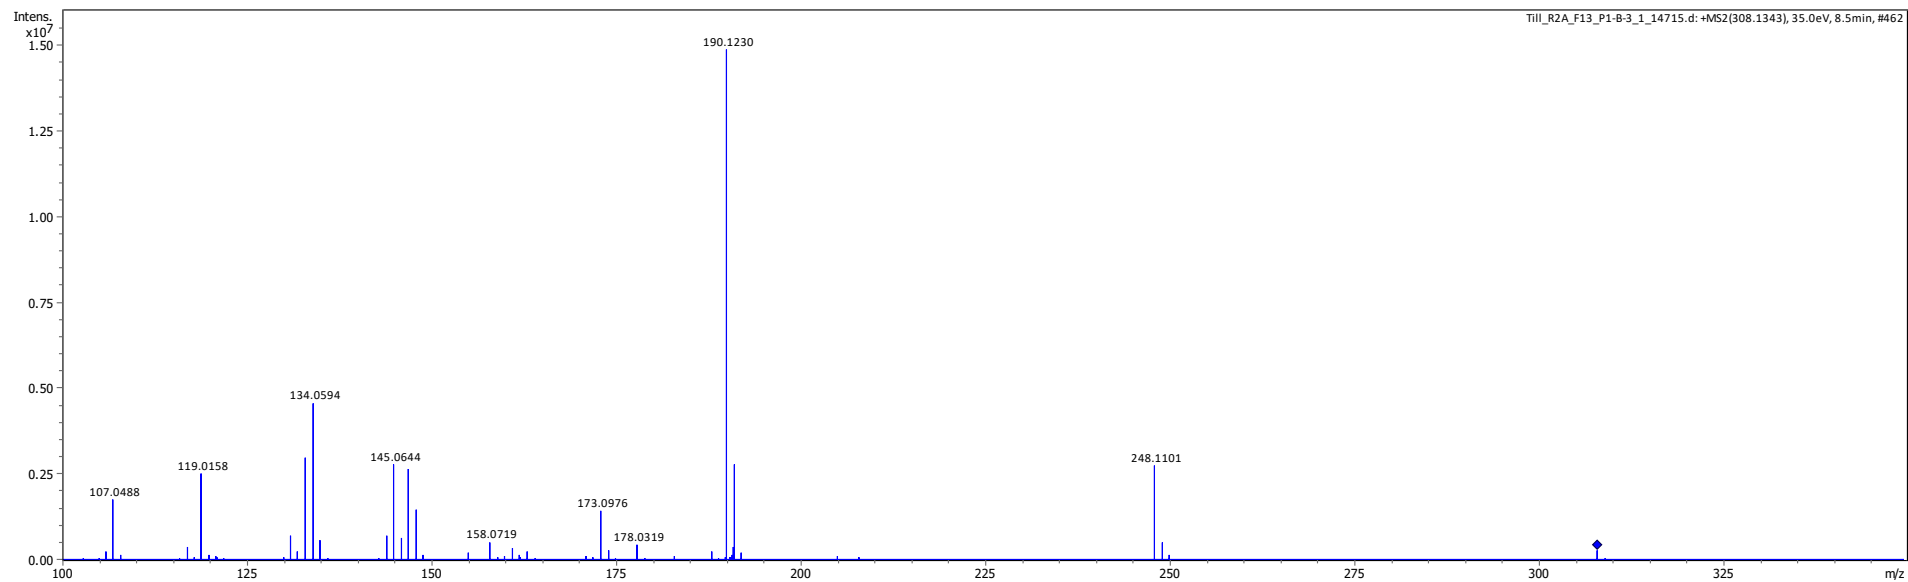

Figure S7: MS/MS spectrum of **2**

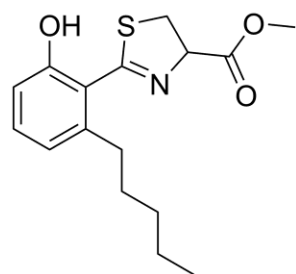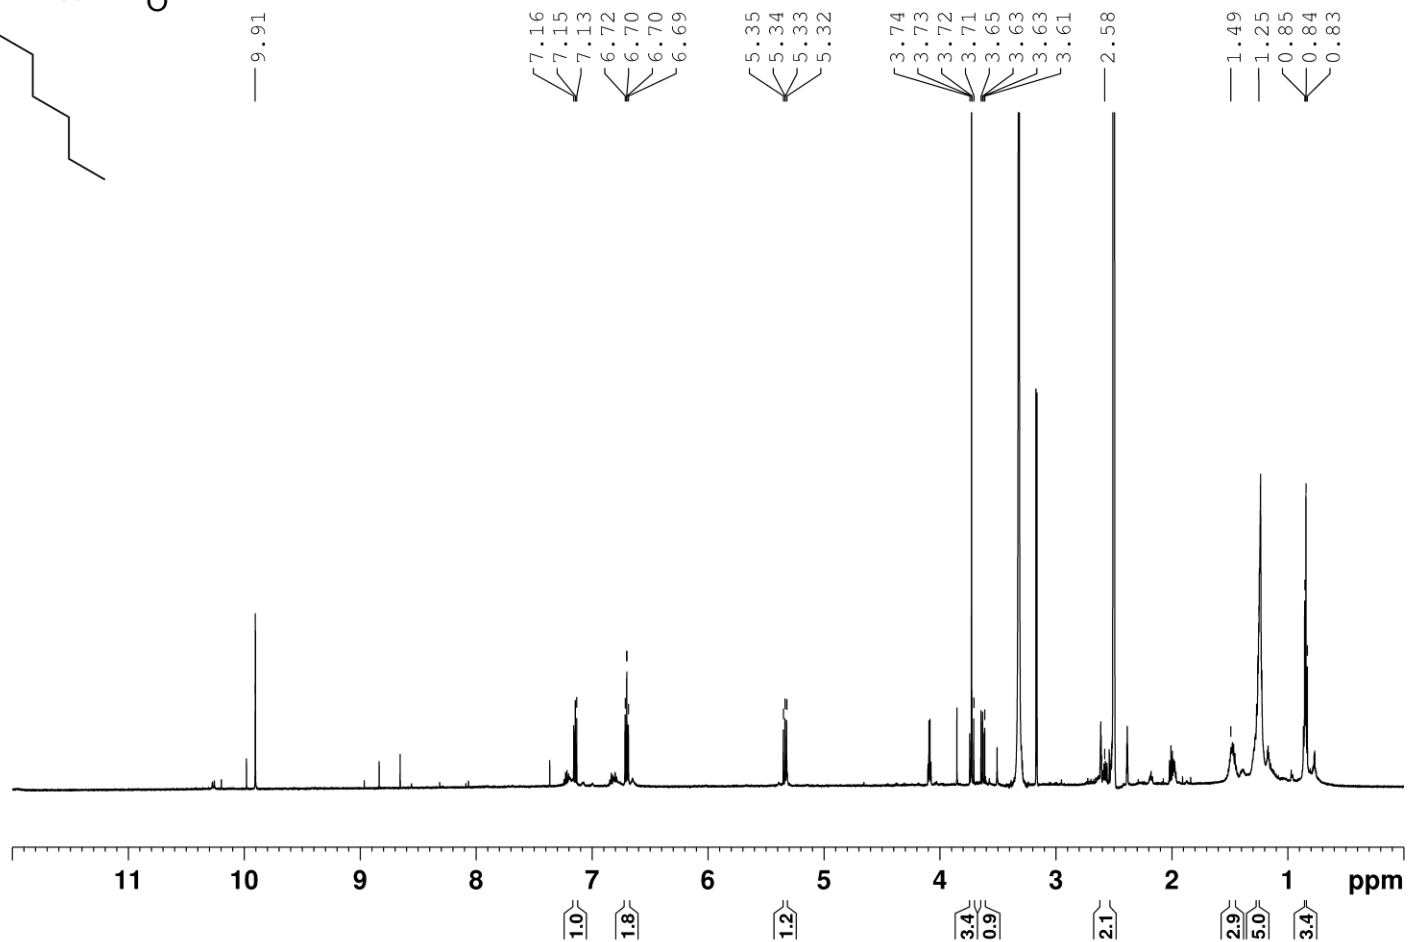

Figure S8:  $^1\text{H}$  NMR spectrum of **2** (600 MHz,  $\text{DMSO-}d_6$ , 25 °C)

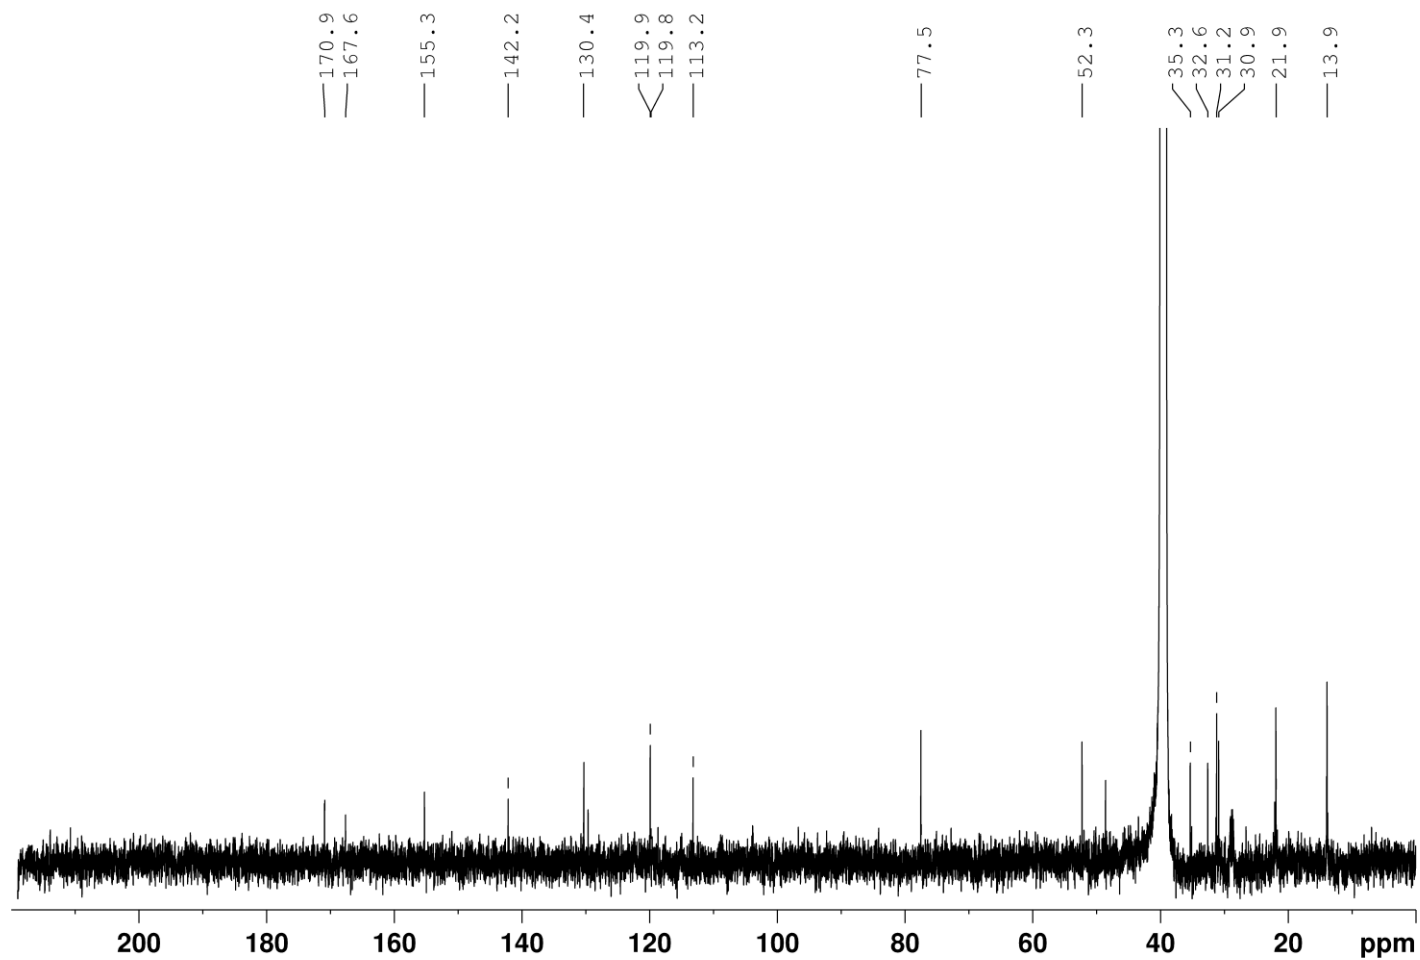

Figure S9:  $^{13}\text{C}$  NMR spectrum of **2** (150 MHz,  $\text{DMSO-}d_6$ ,  $25\text{ }^\circ\text{C}$ )

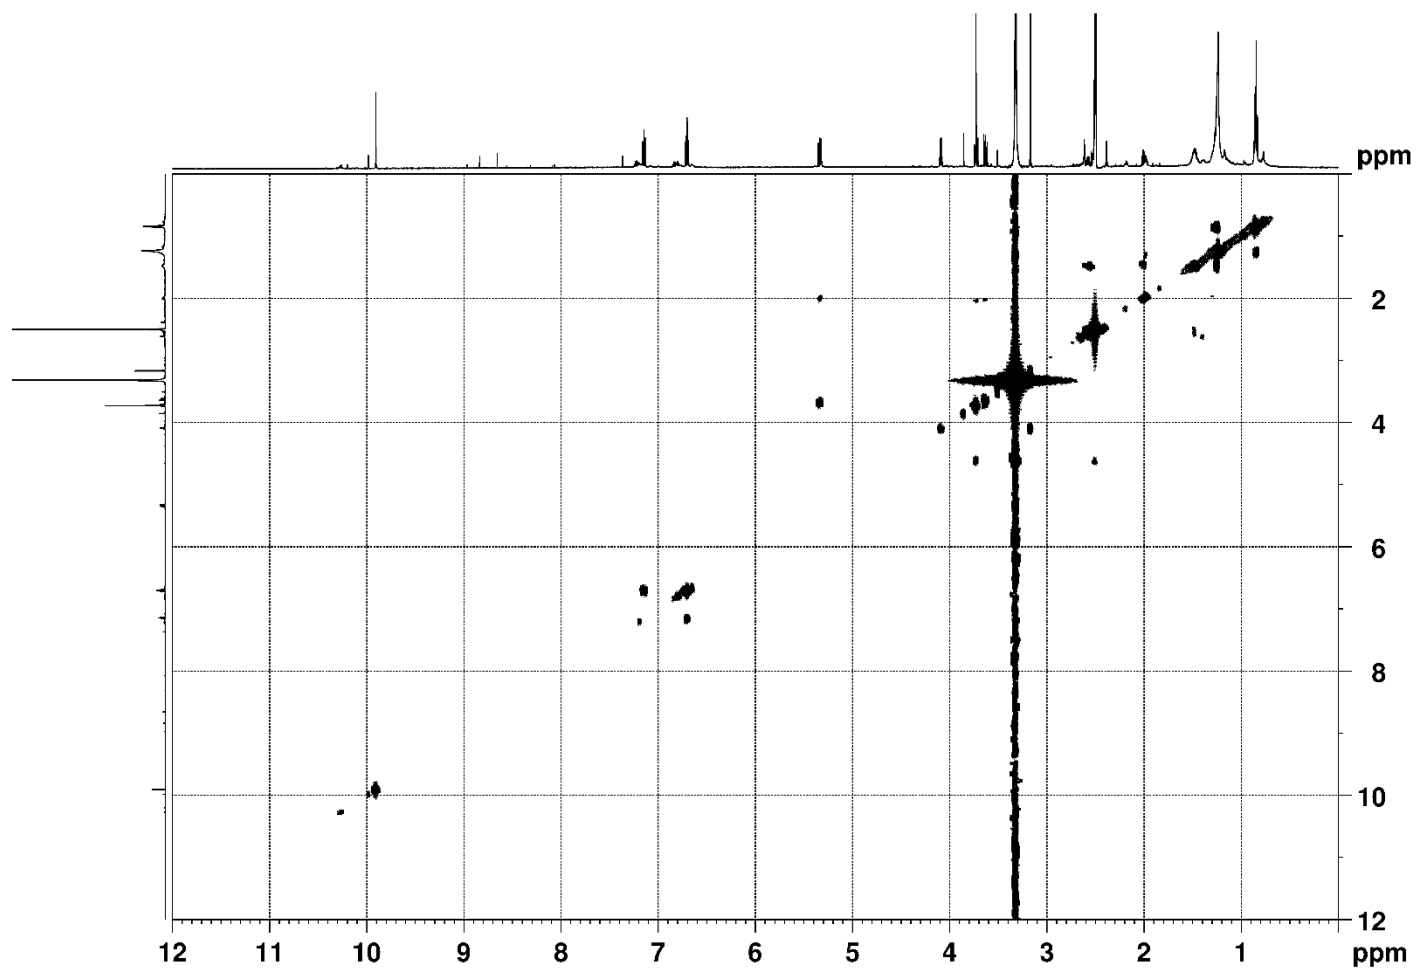

Figure S10: COSY spectrum of **2** (600 MHz, DMSO- $d_6$ , 25 °C)



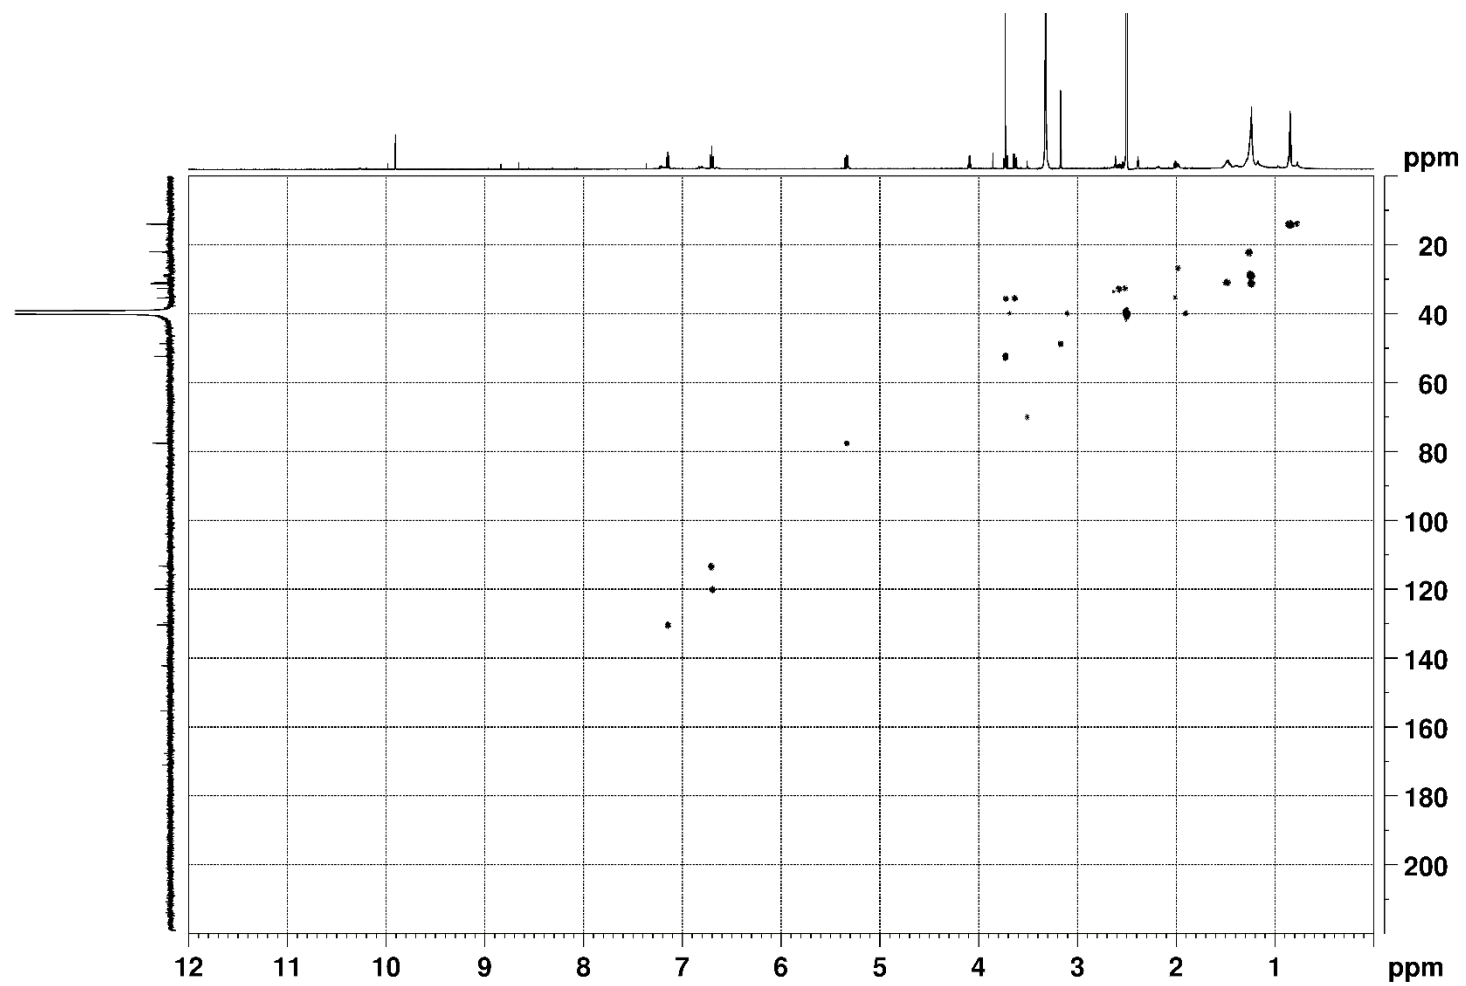

Figure S11: HSQC spectrum of **2** (600 MHz,  $\text{DMSO}-d_6$ , 25 °C)

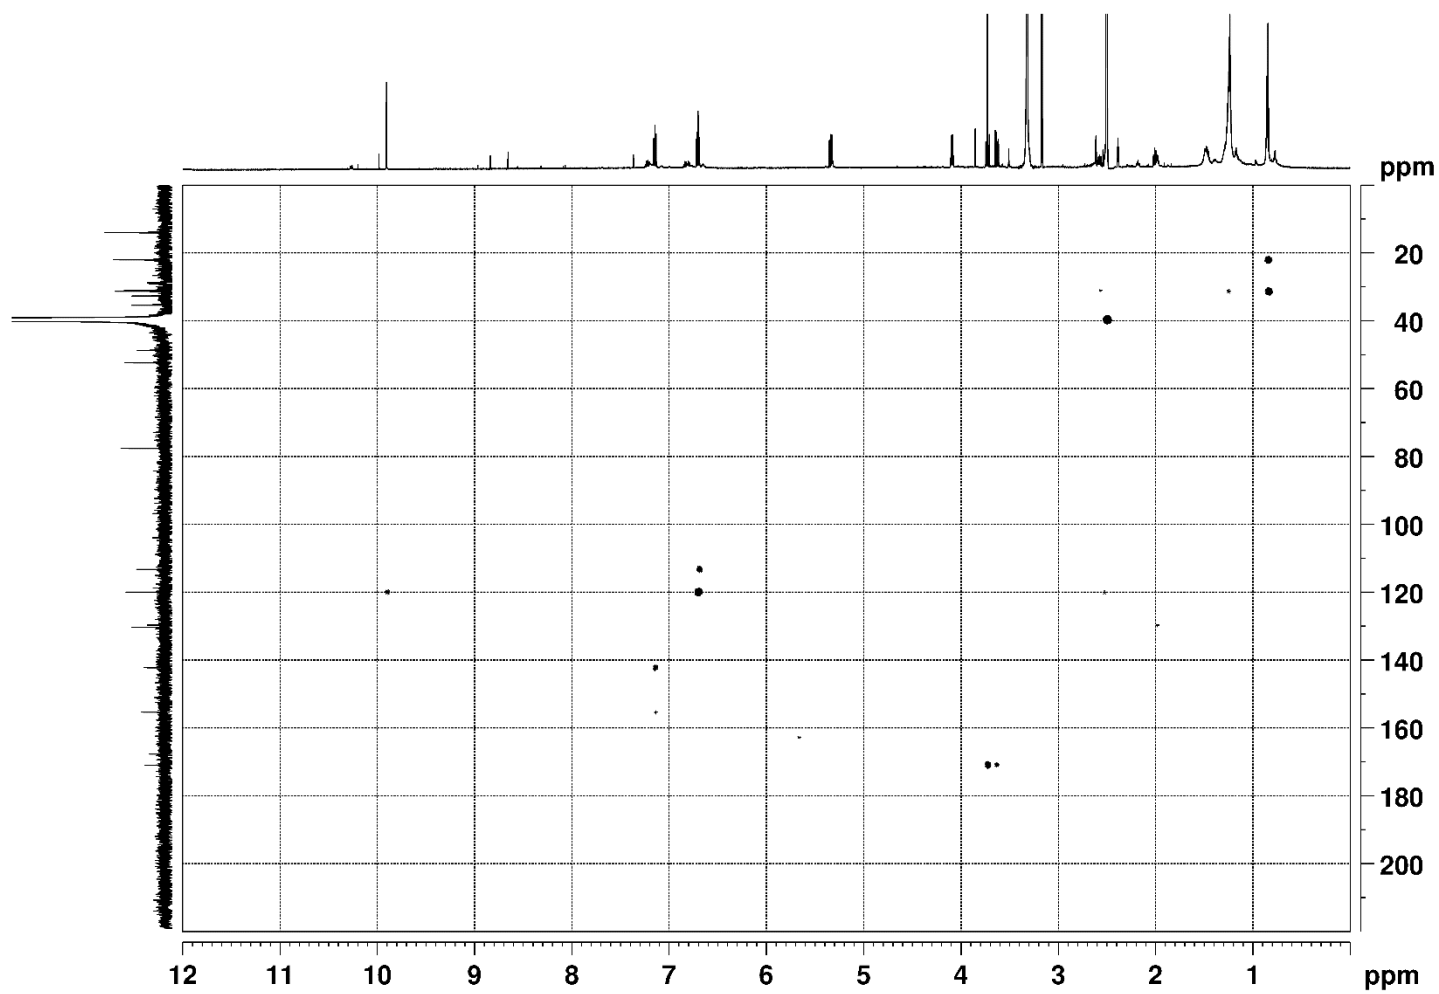

Figure S12: HMBC spectrum of **2** (600 MHz, DMSO-*d*<sub>6</sub>, 25 °C)

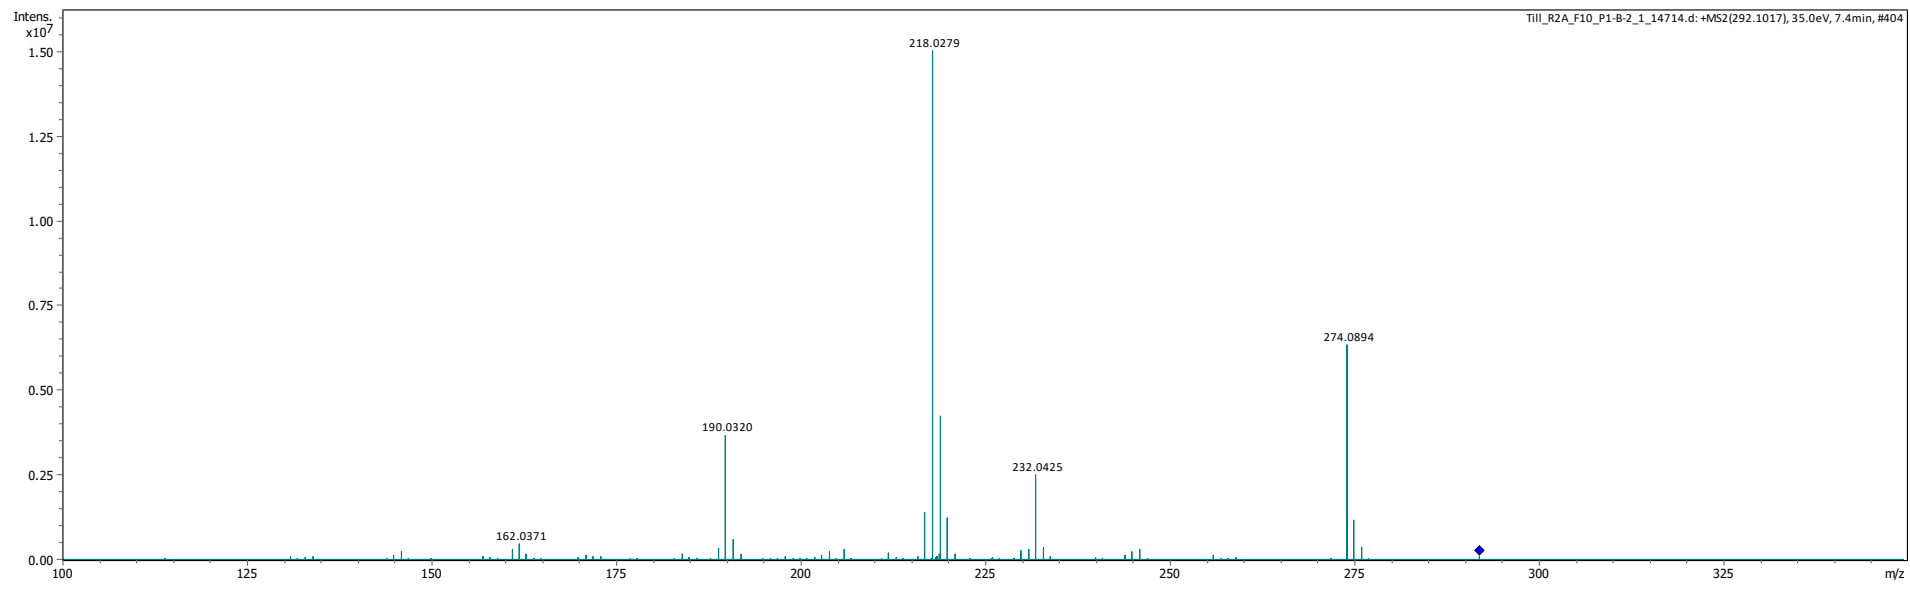

Figure S13: MS/MS spectrum of **3**

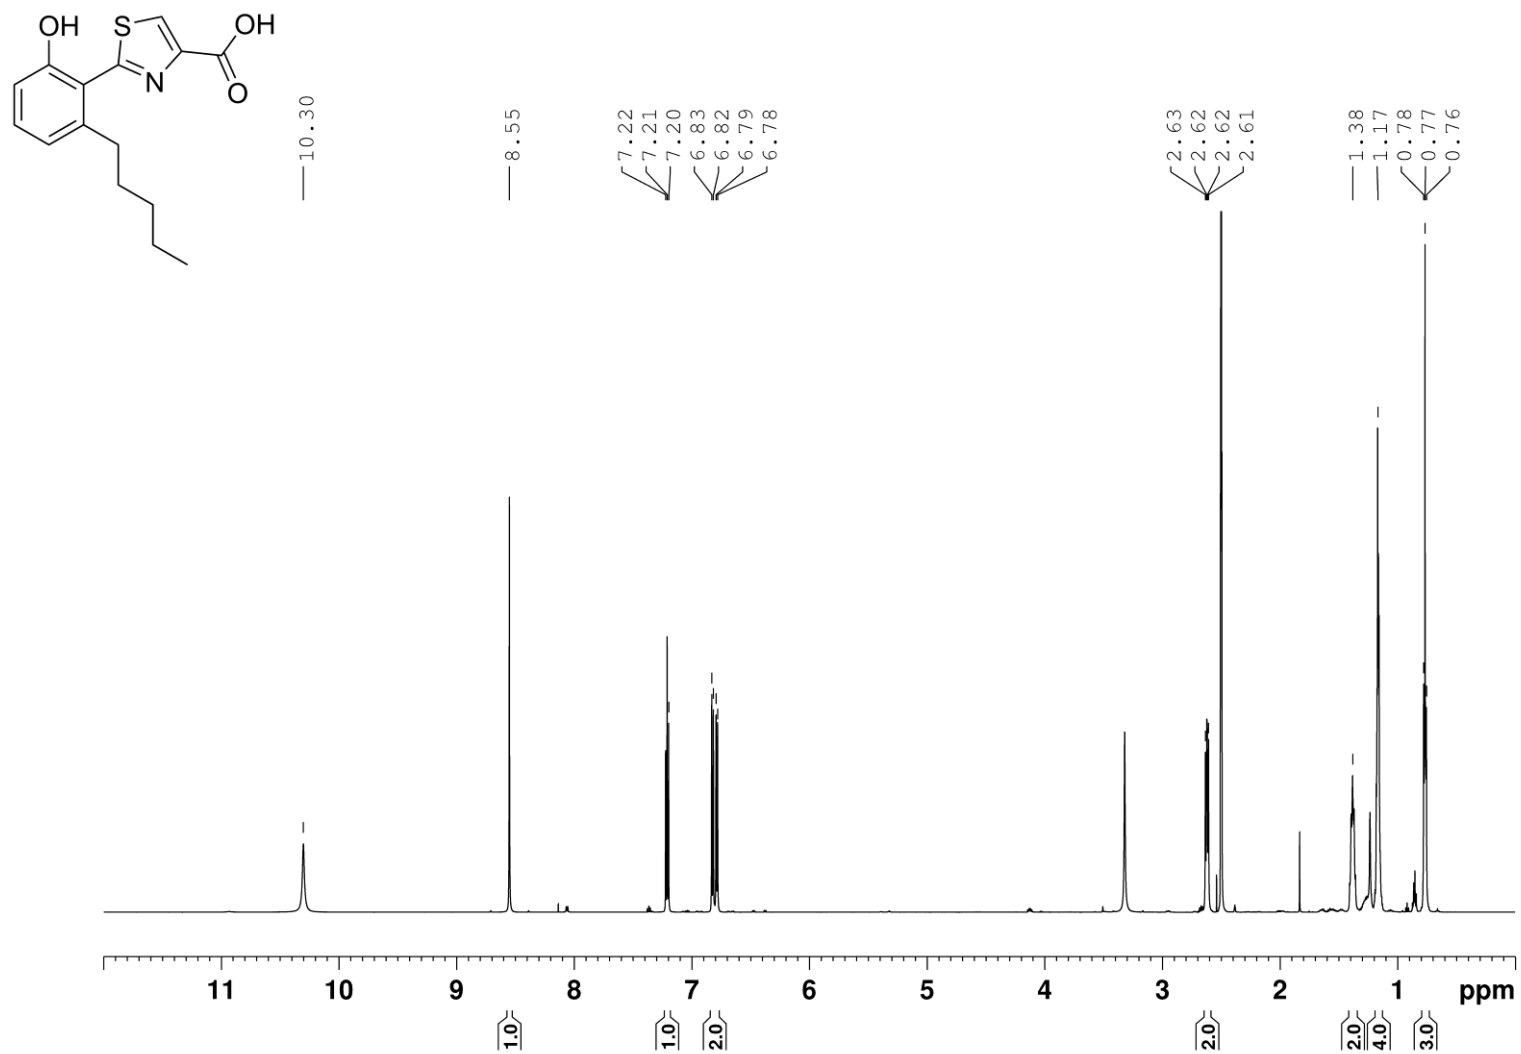

Figure S14: <sup>1</sup>H NMR spectrum of **3** (600 MHz, DMSO-*d*<sub>6</sub>, 25 °C)

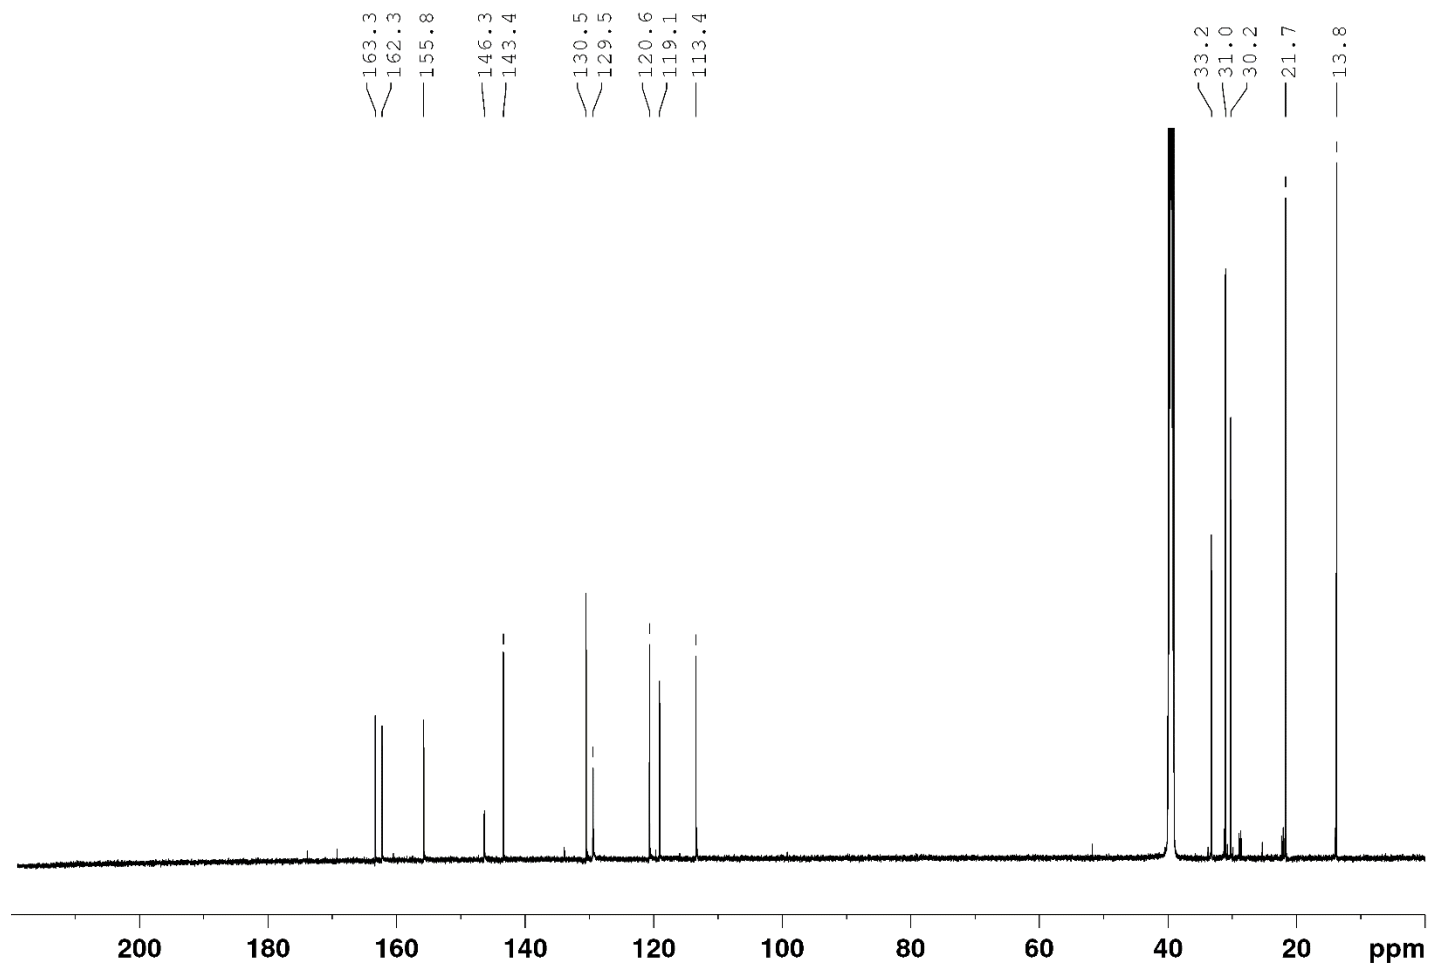

Figure S15:  $^{13}\text{C}$  NMR spectrum of **3** (150 MHz, DMSO- $d_6$ , 25 °C)

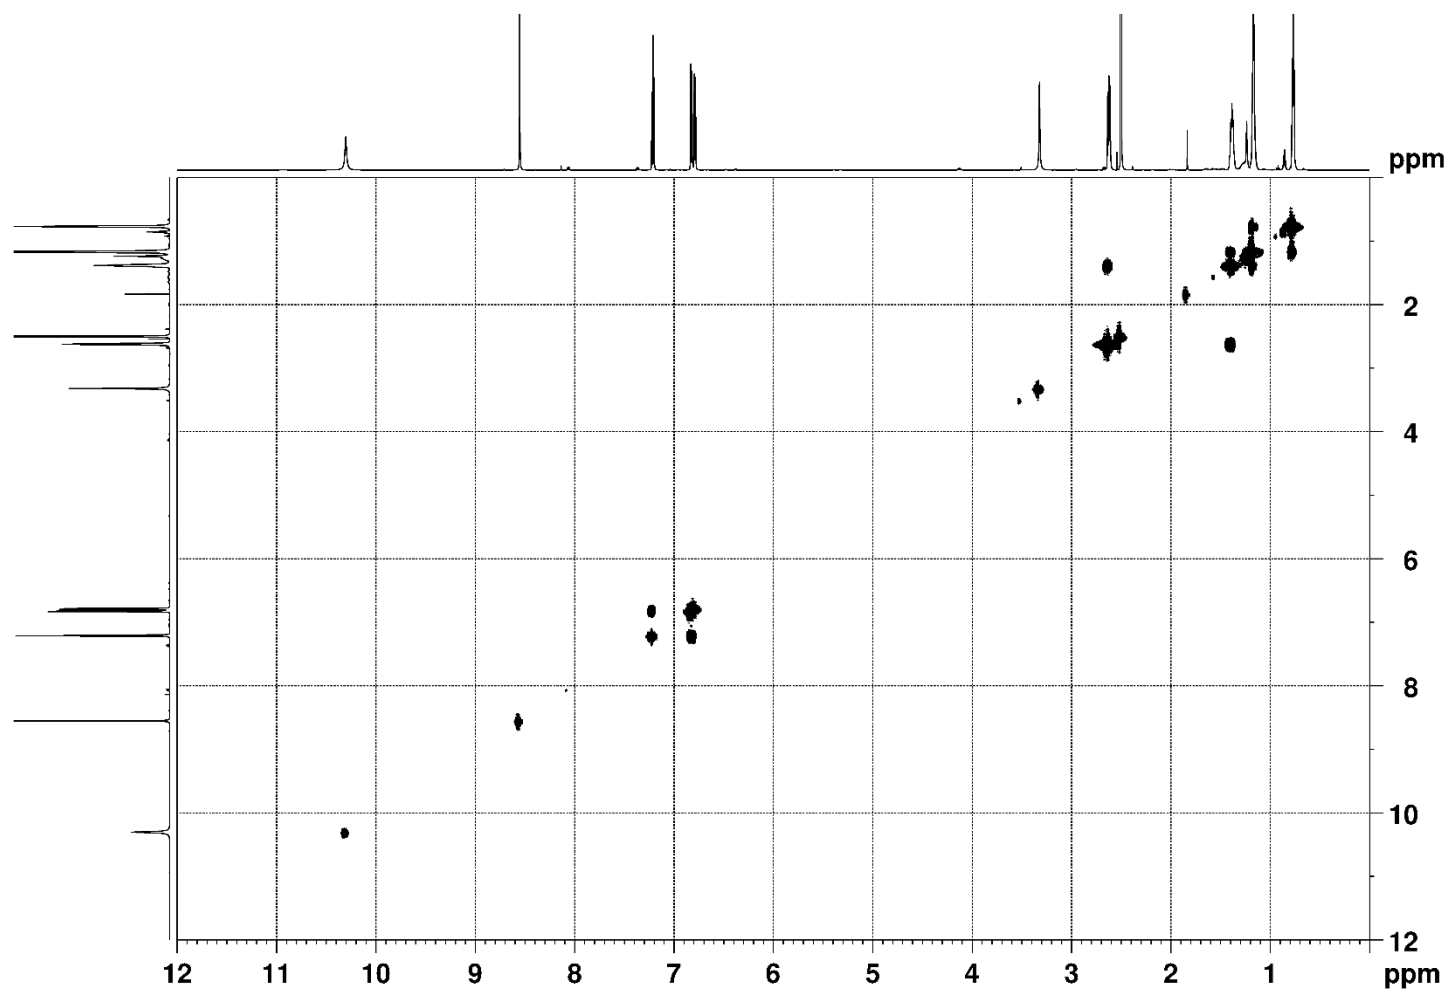

Figure S16: COSY spectrum of **3** (600 MHz, DMSO-*d*<sub>6</sub>, 25 °C)

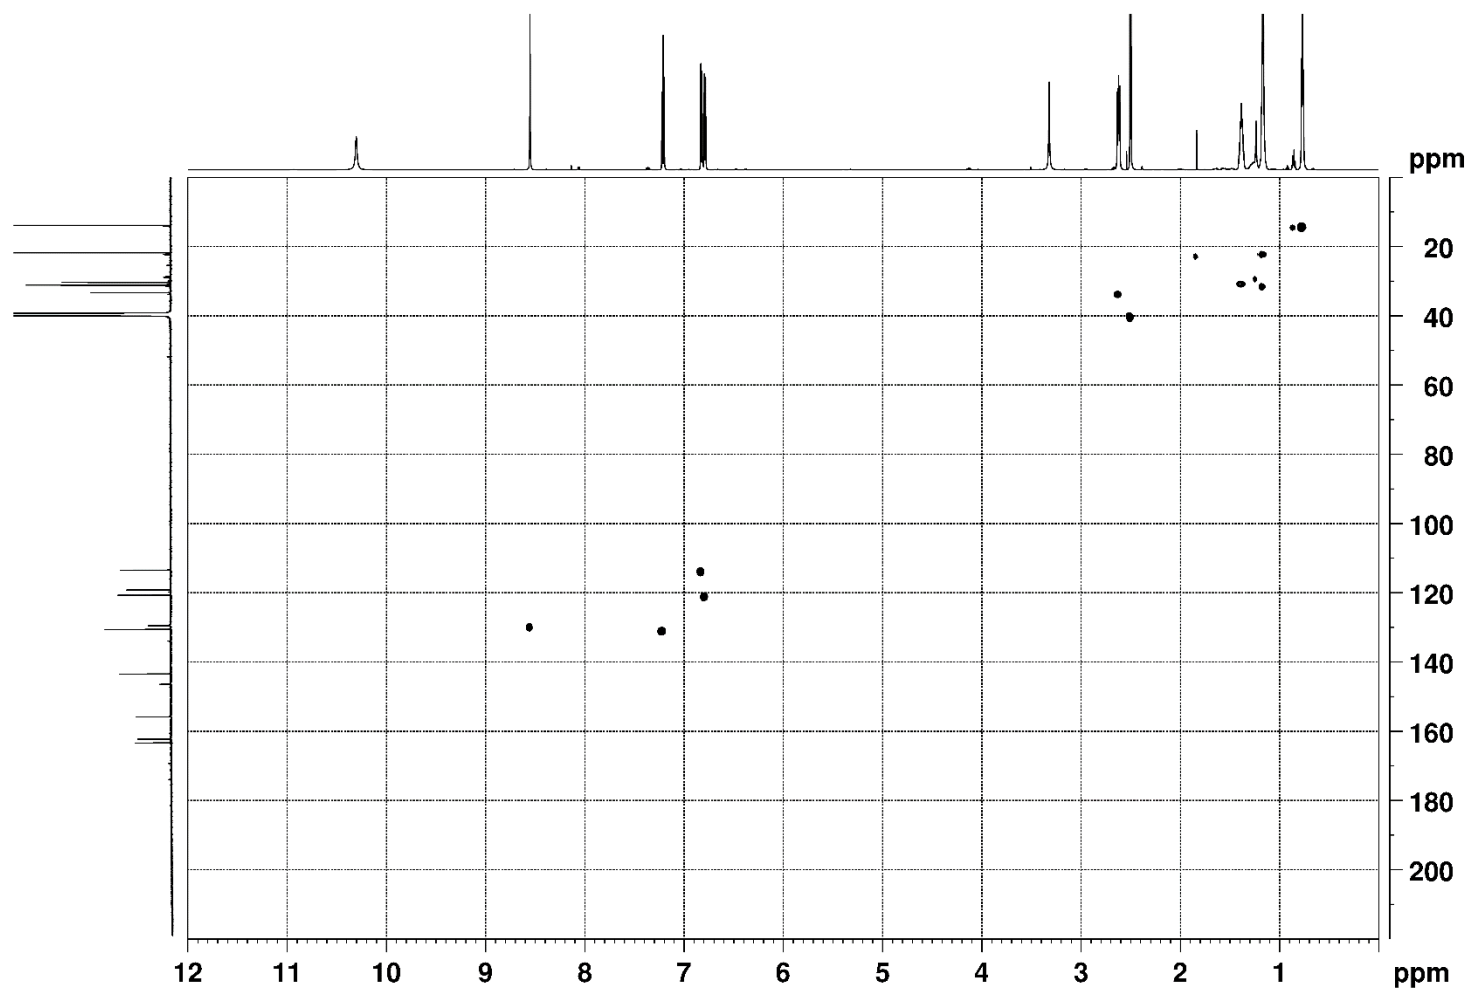

Figure S17: HSQC spectrum of **3** (600 MHz,  $\text{DMSO-}d_6$ , 25 °C)

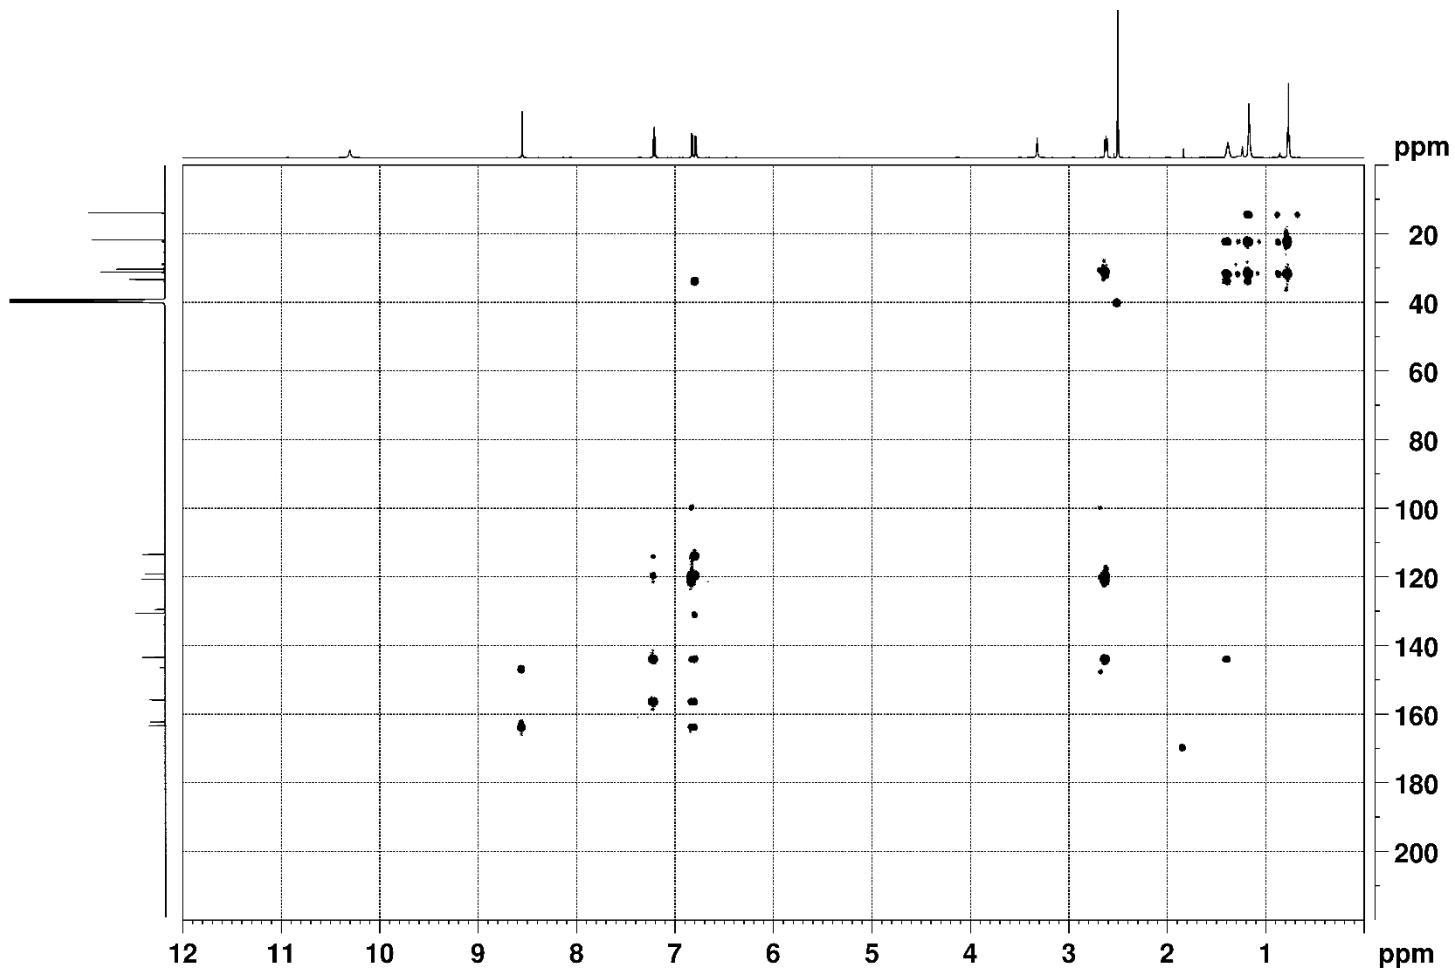

Figure S18: HMBC spectrum of **3** (600 MHz, DMSO- $d_6$ , 25 °C)



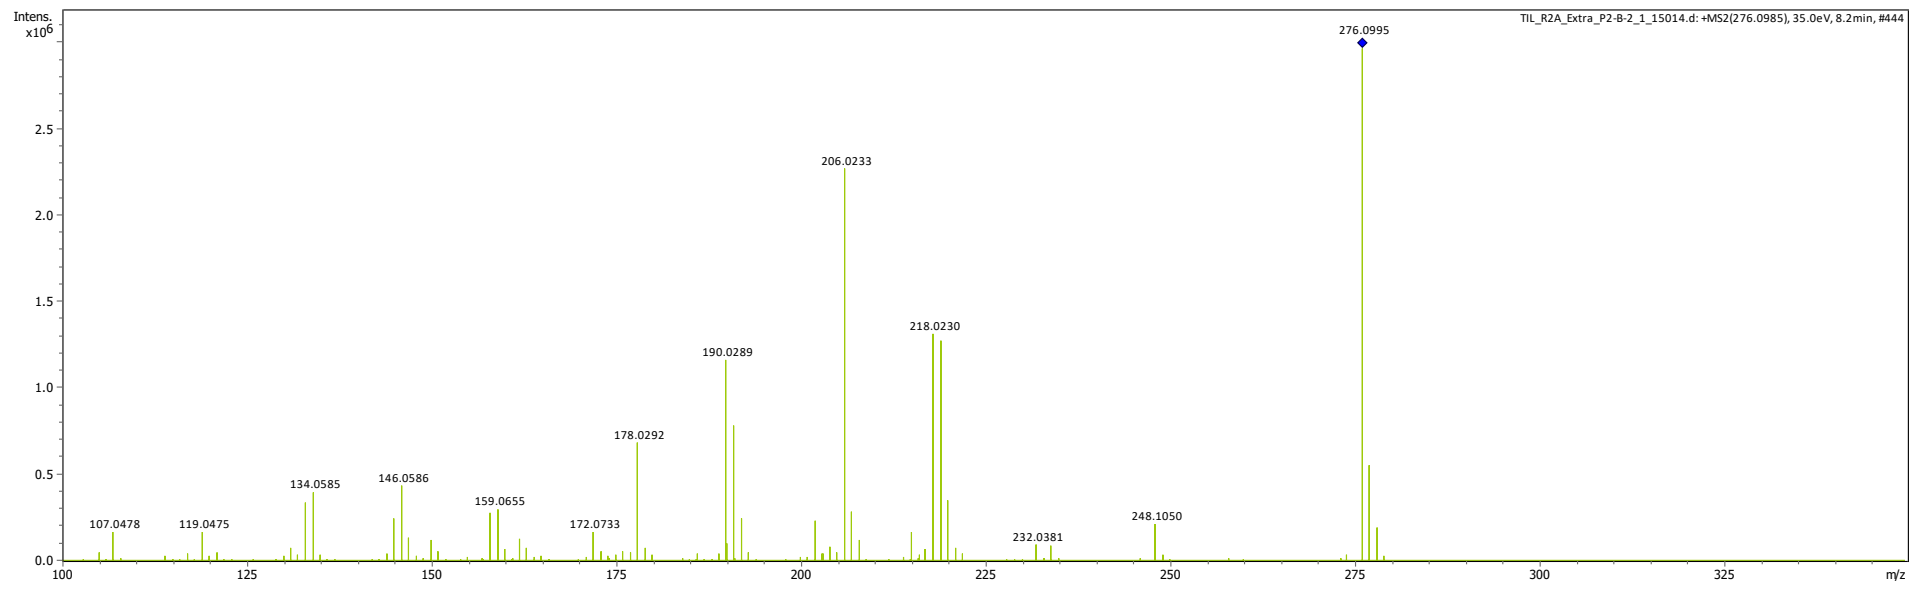

Figure S19: MS/MS spectrum of **4**

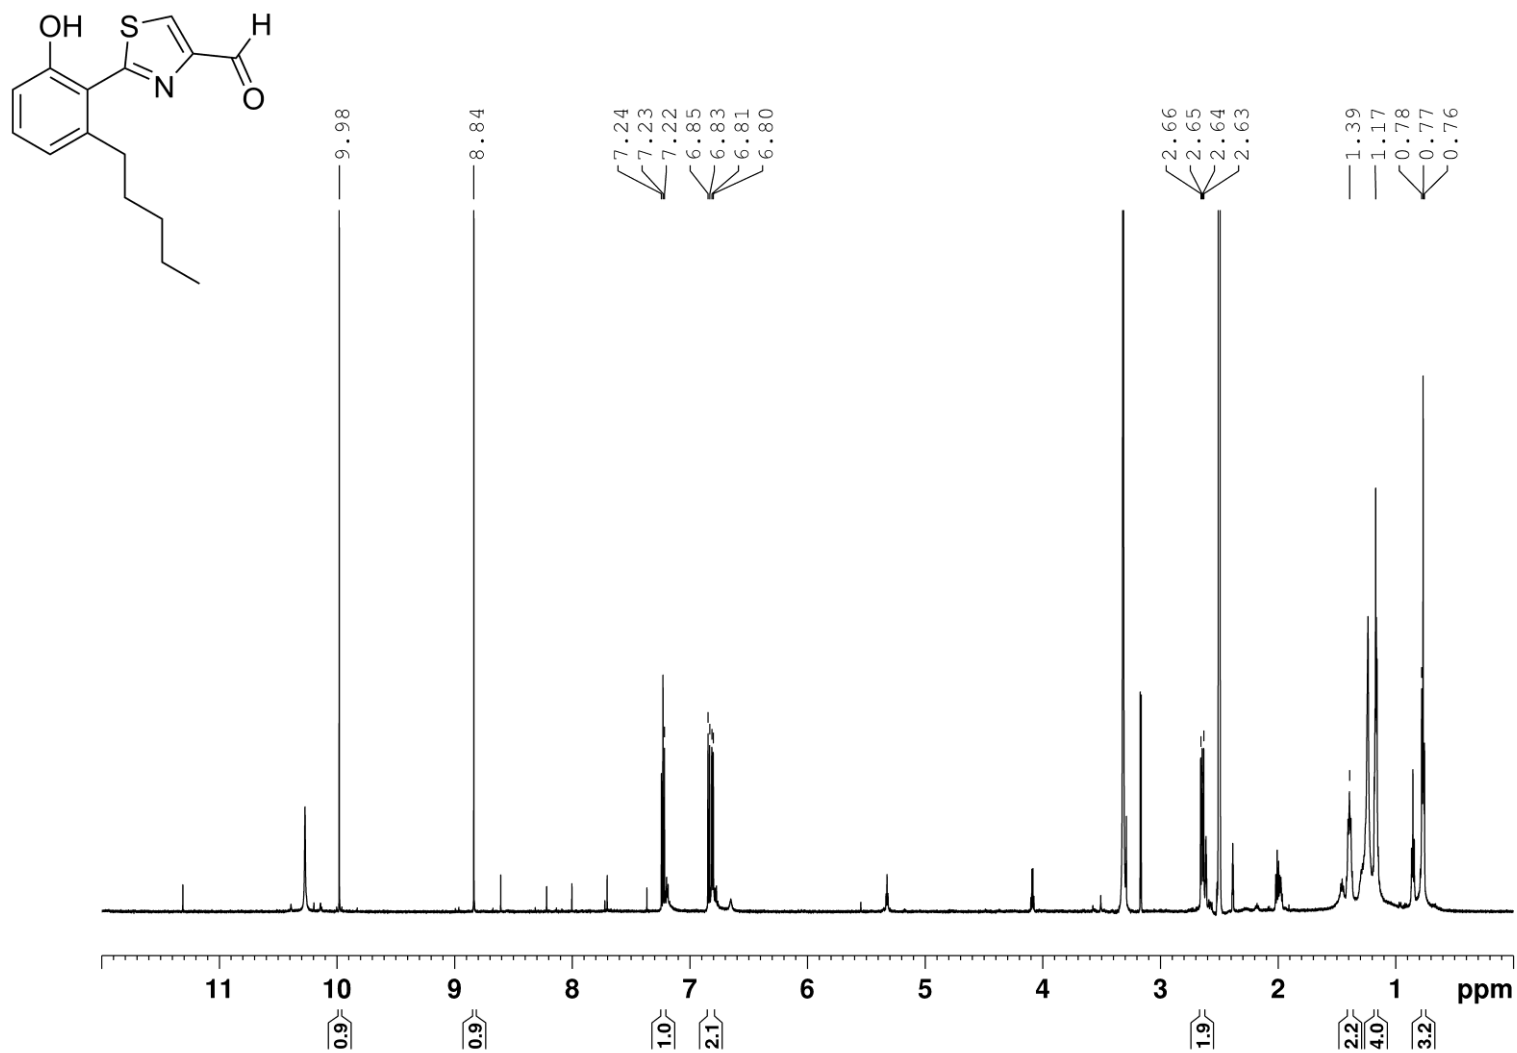

Figure S20:  $^1\text{H}$  NMR spectrum of 4 (600 MHz,  $\text{DMSO}-d_6$ , 25 °C)

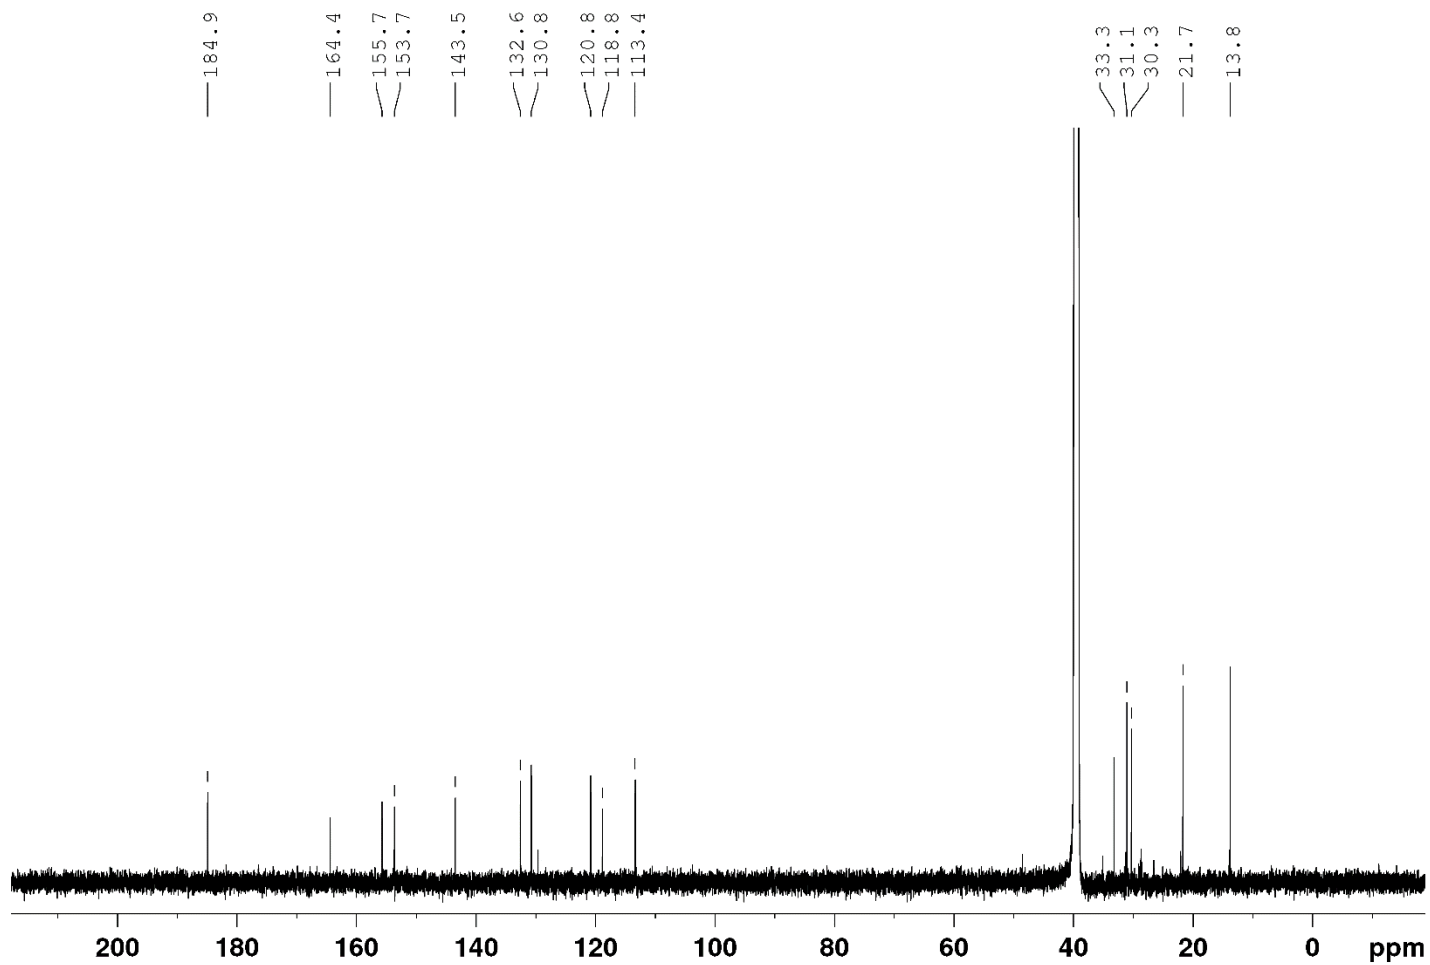

Figure S21:  $^{13}\text{C}$  NMR spectrum of **4** (150 MHz,  $\text{DMSO-}d_6$ , 25 °C)

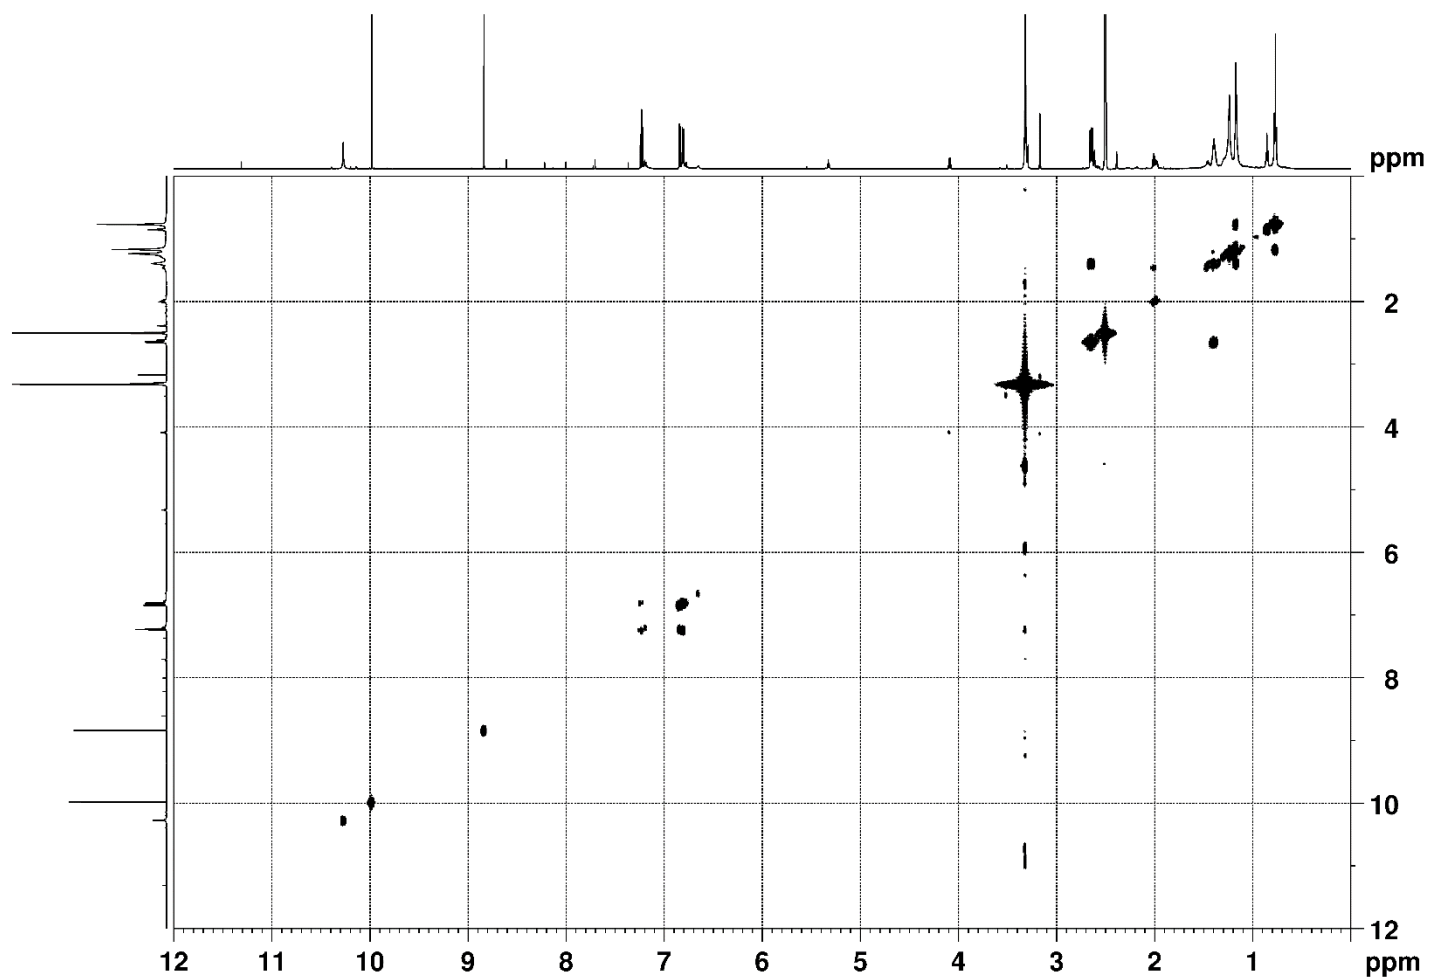

Figure S22: COSY spectrum of **4** (600 MHz, DMSO-*d*<sub>6</sub>, 25 °C)

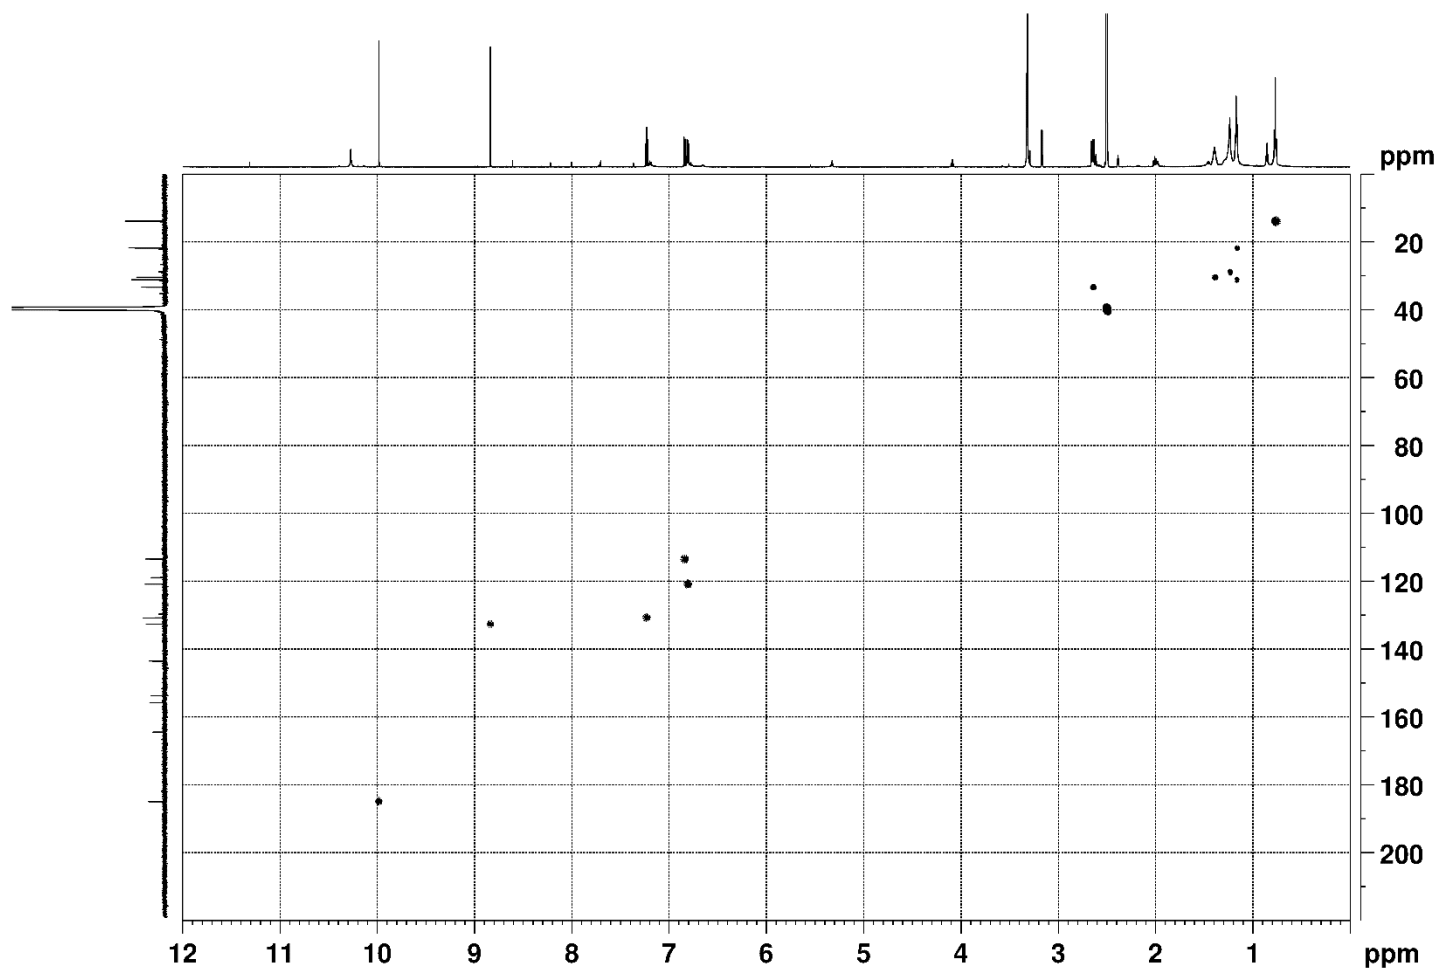

Figure S23: HSQC spectrum of **4** (600 MHz,  $\text{DMSO}-d_6$ , 25 °C)

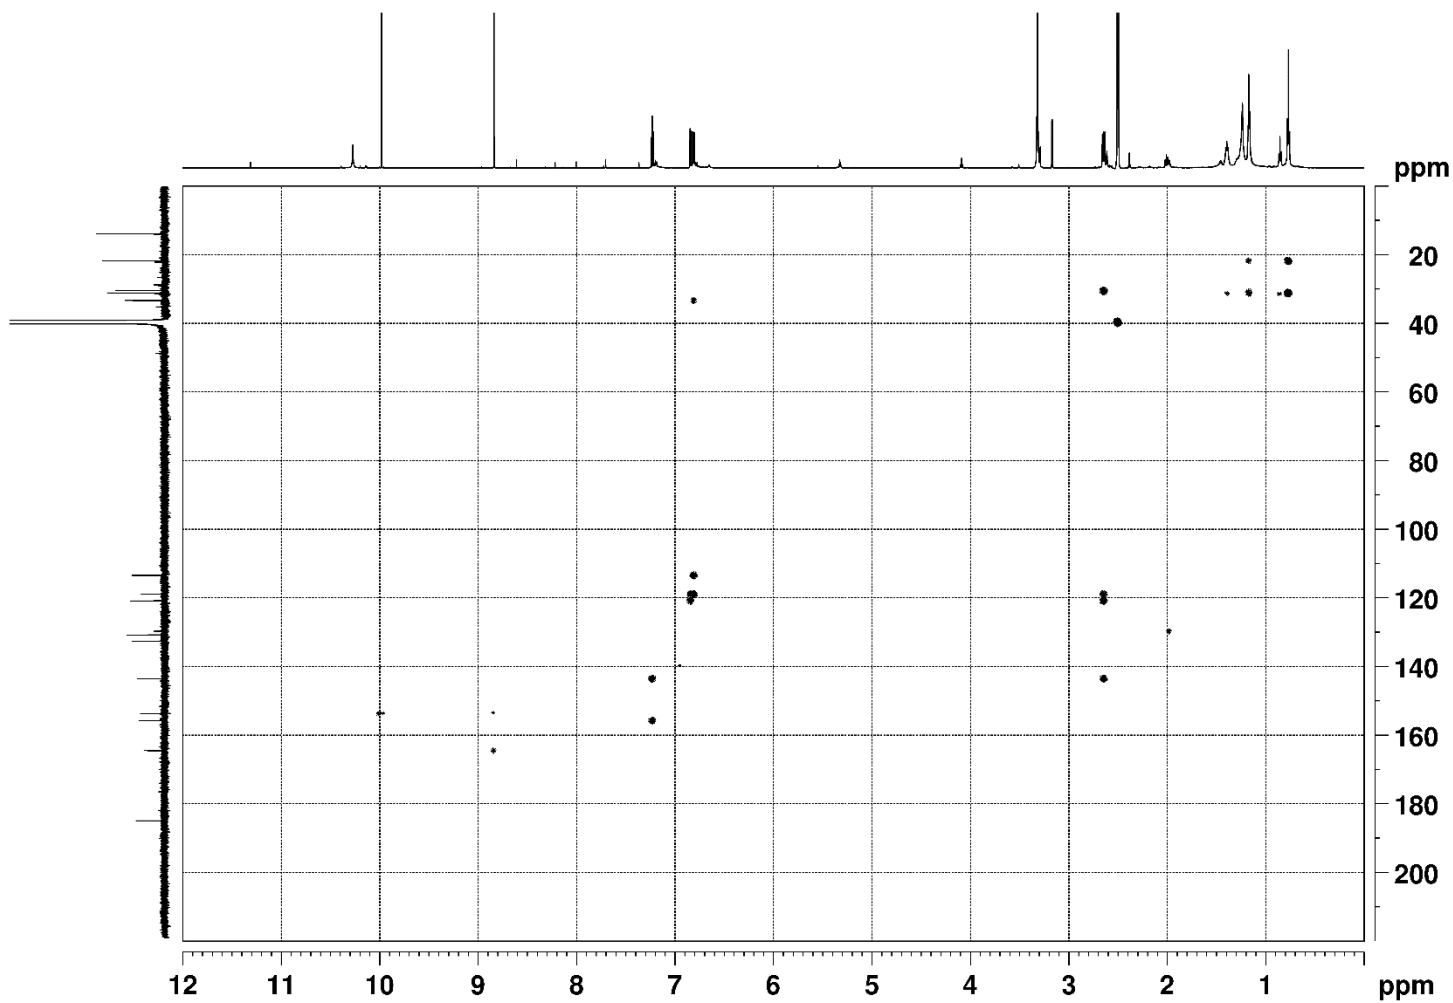

Figure S24: HMBC spectrum of 4 (600 MHz, DMSO-*d*<sub>6</sub>, 25 °C)

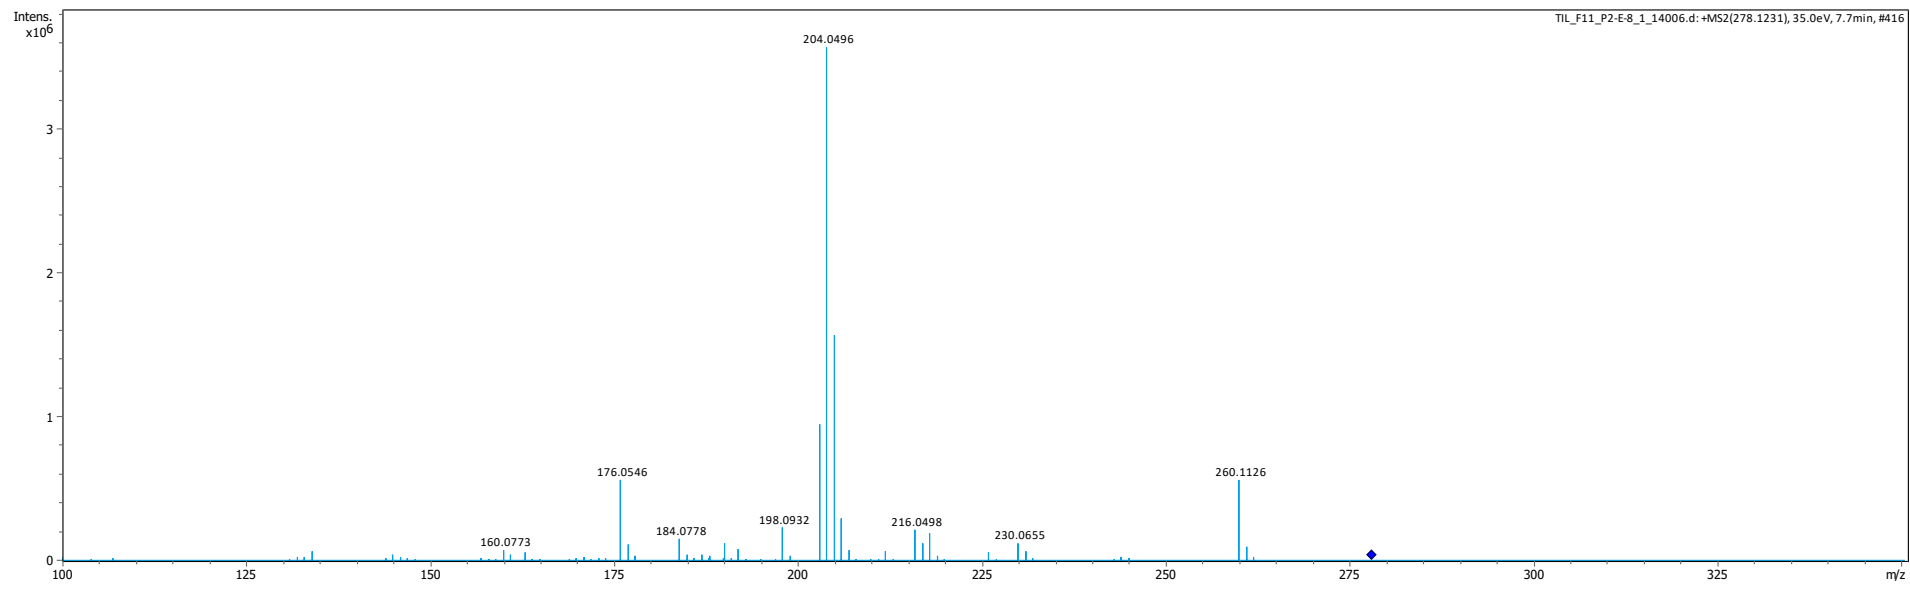

Figure S25: MS/MS spectrum of 5

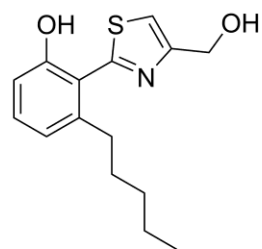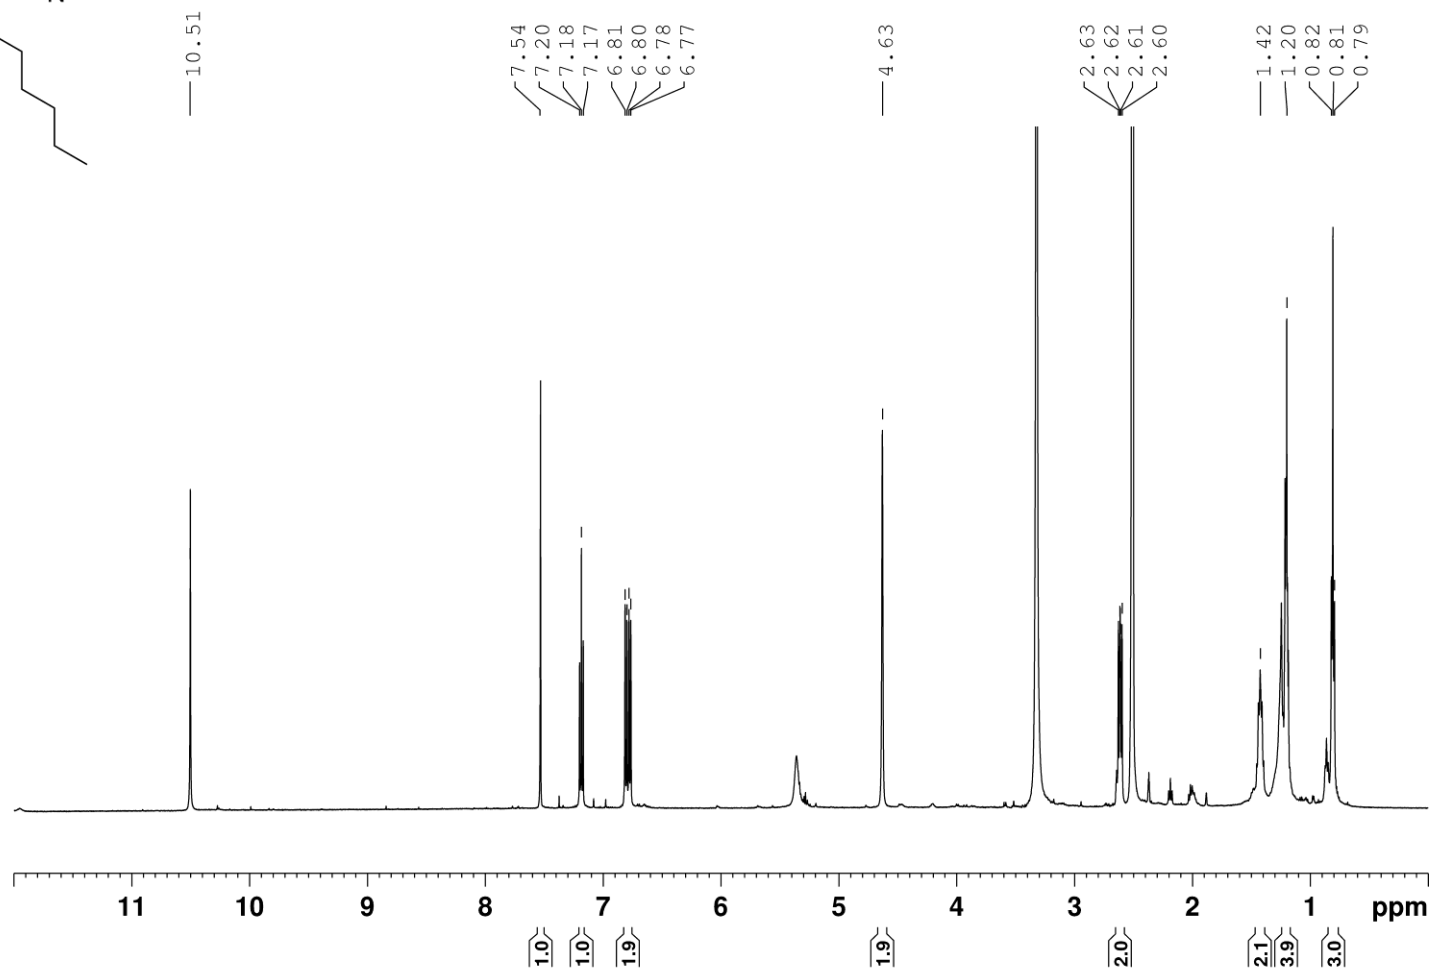

Figure S26:  $^1\text{H}$  NMR spectrum of **5** (600 MHz,  $\text{DMSO-}d_6$ , 25 °C)



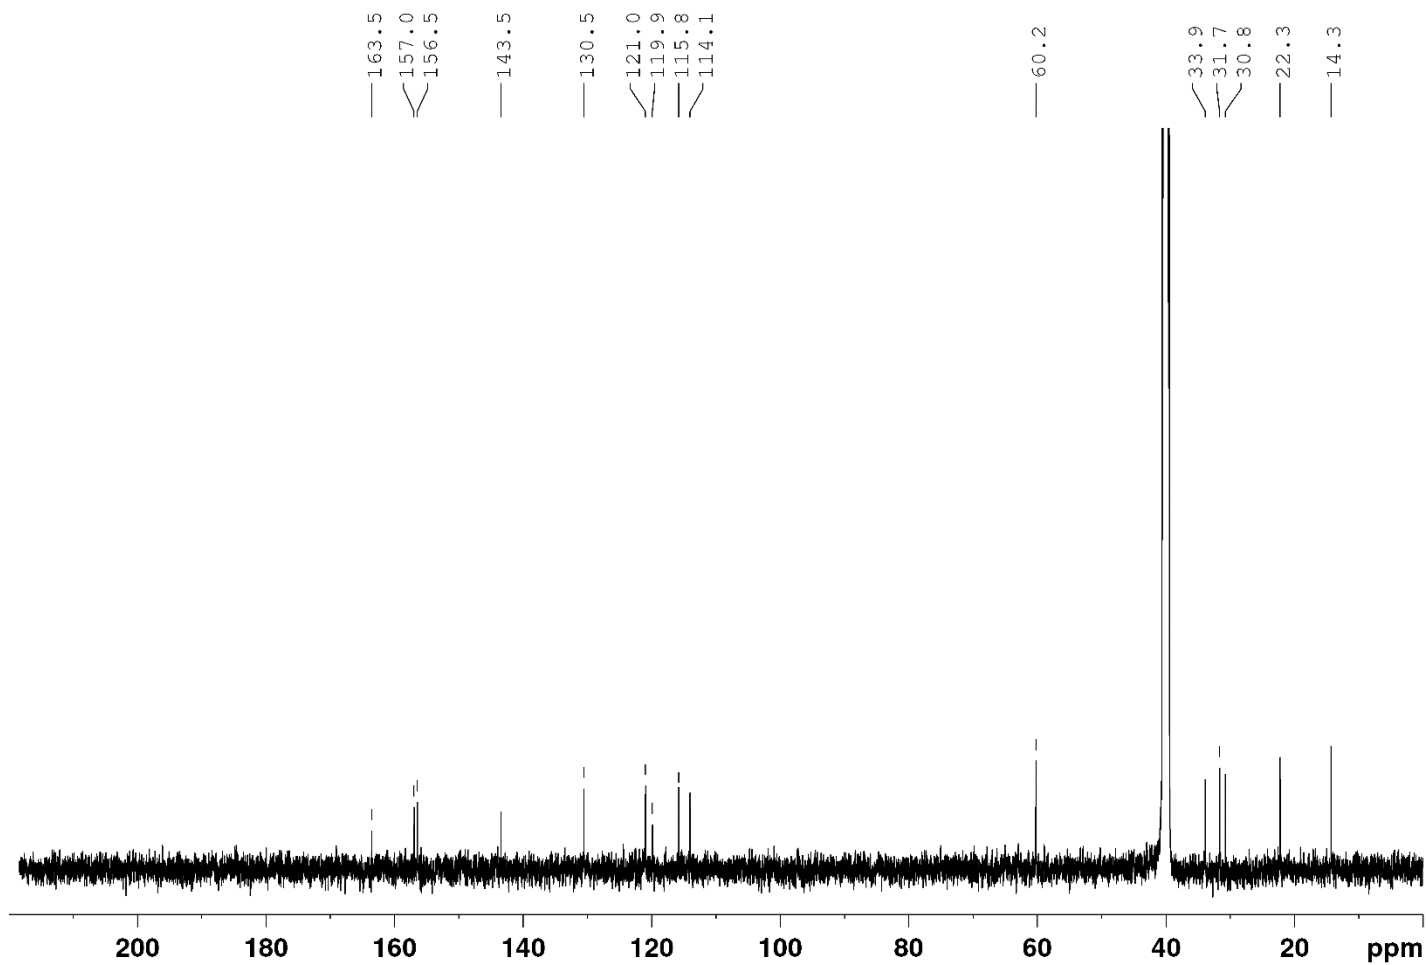

Figure S27:  $^{13}\text{C}$  NMR spectrum of **5** (150 MHz,  $\text{DMSO-}d_6$ , 25 °C)

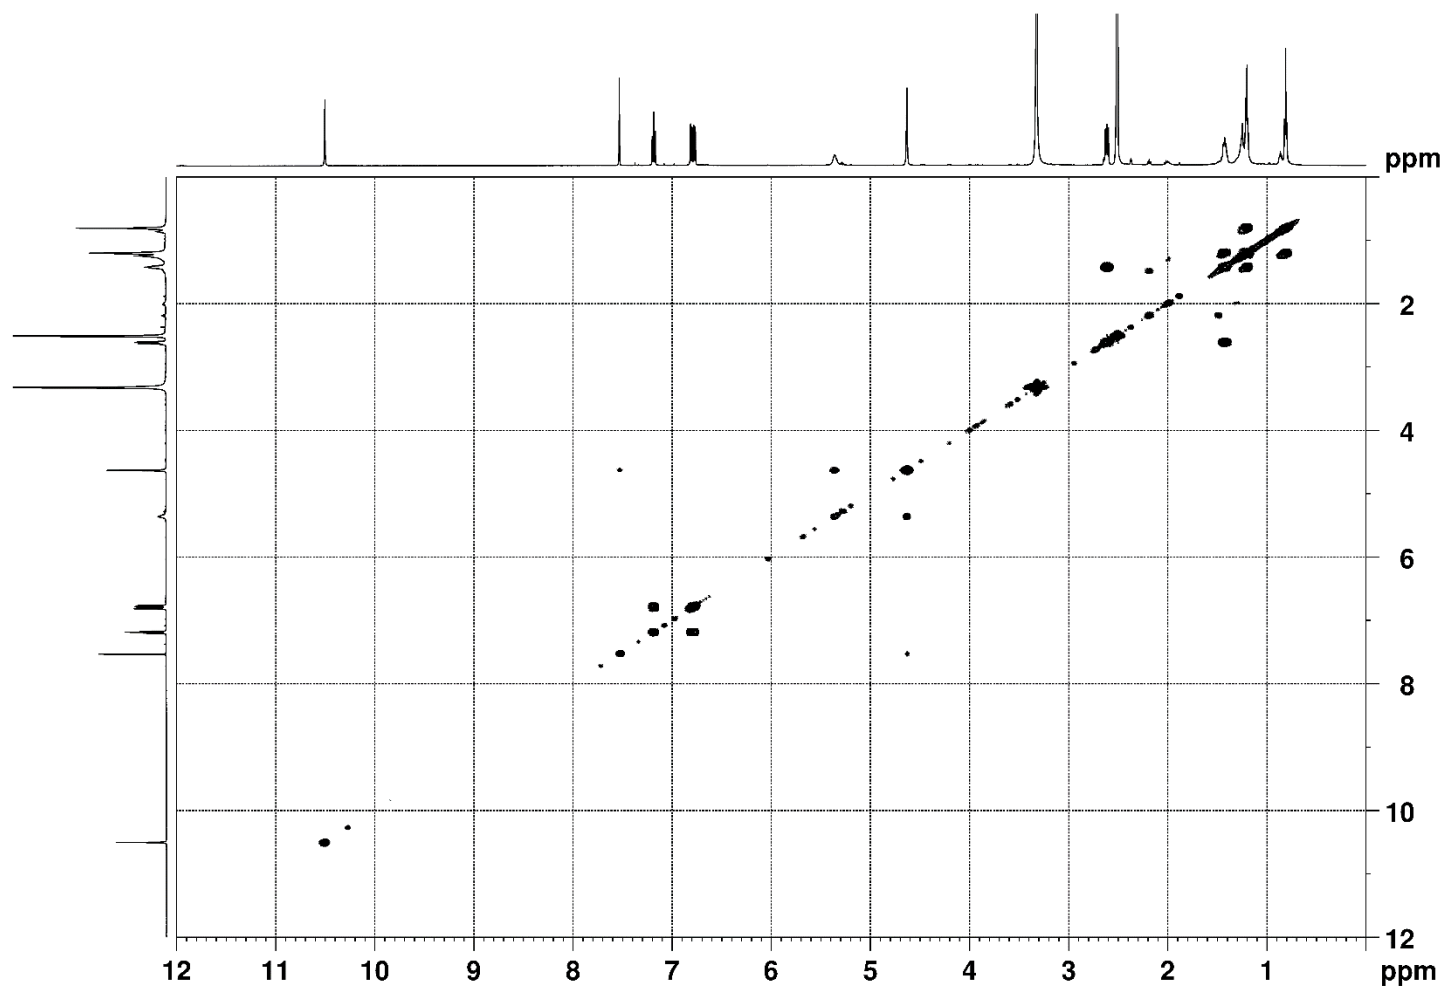

Figure S28: COSY spectrum of **5** (600 MHz, DMSO-*d*<sub>6</sub>, 25 °C)

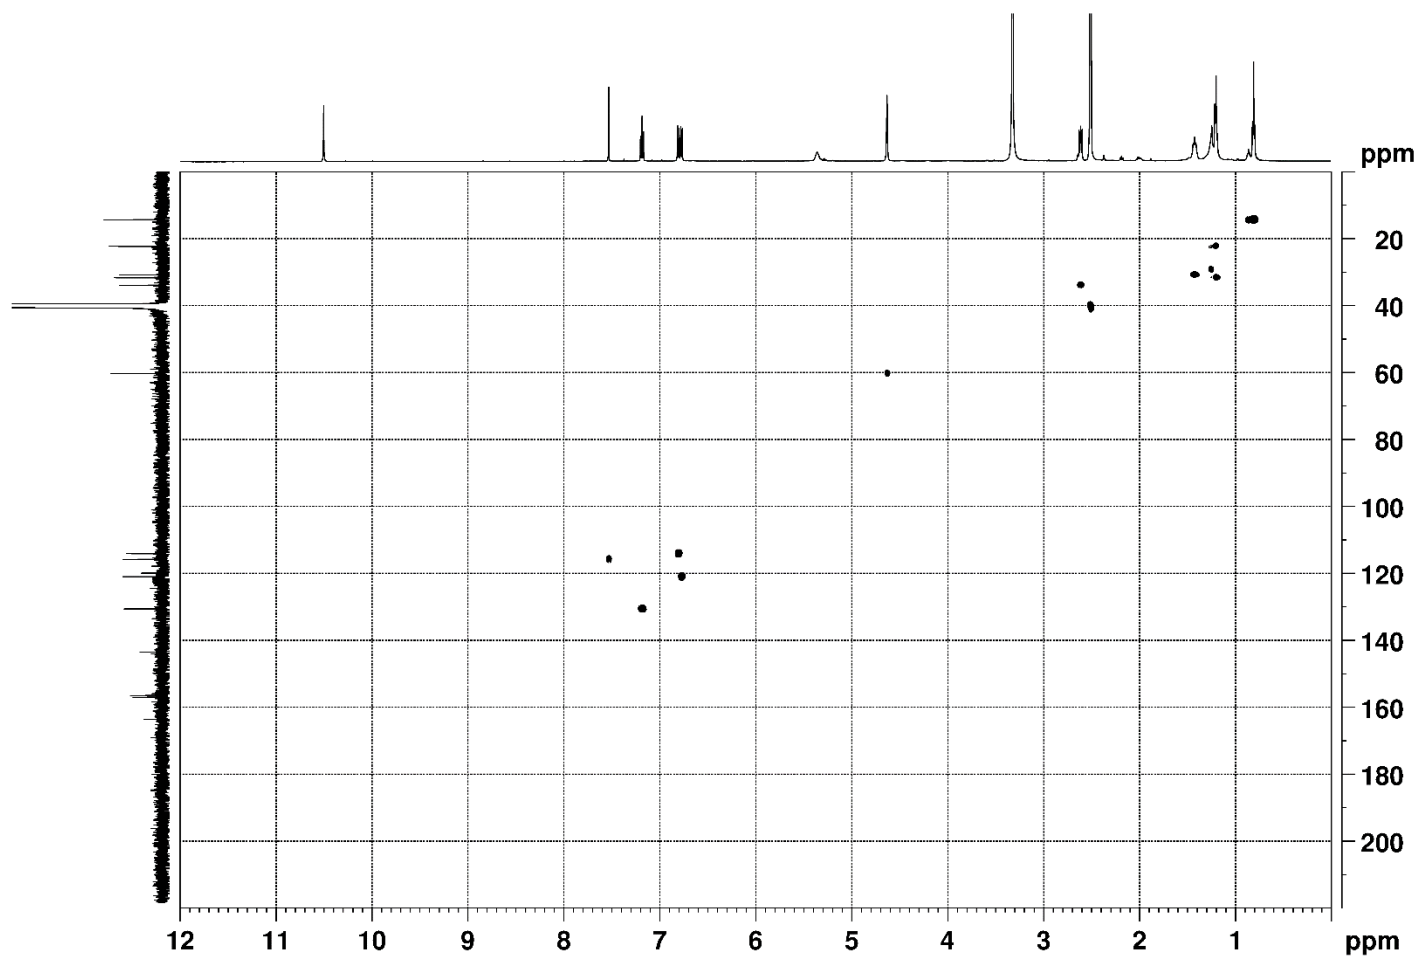

Figure S29: HSQC spectrum of **5** (600 MHz,  $\text{DMSO}-d_6$ , 25 °C)

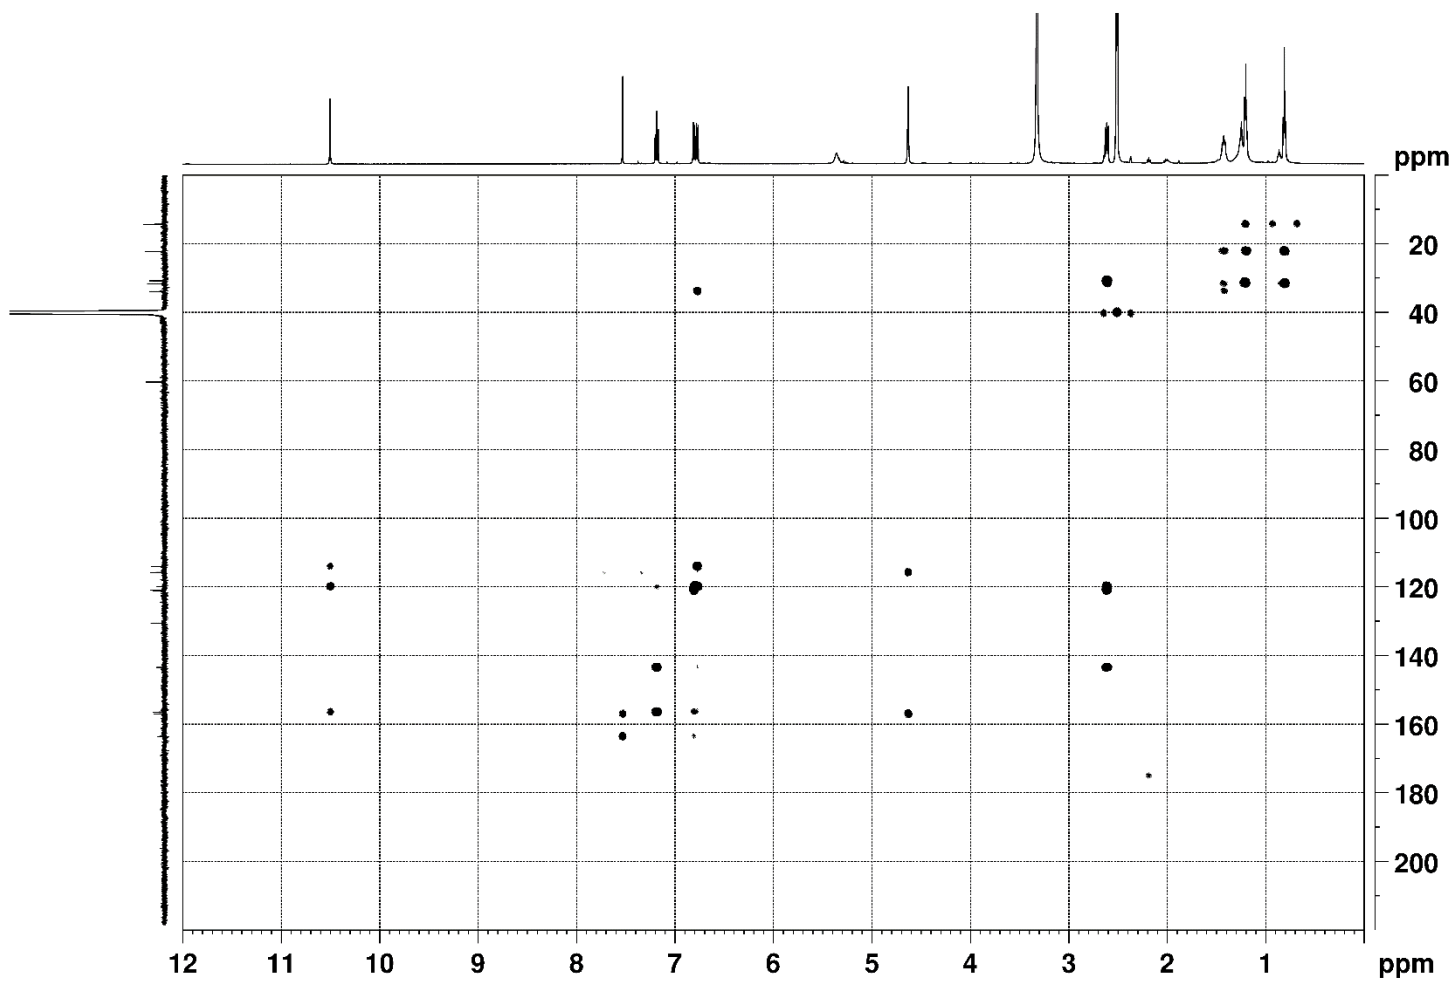

Figure S30: HMBC spectrum of **5** (600 MHz, DMSO-*d*<sub>6</sub>, 25 °C)

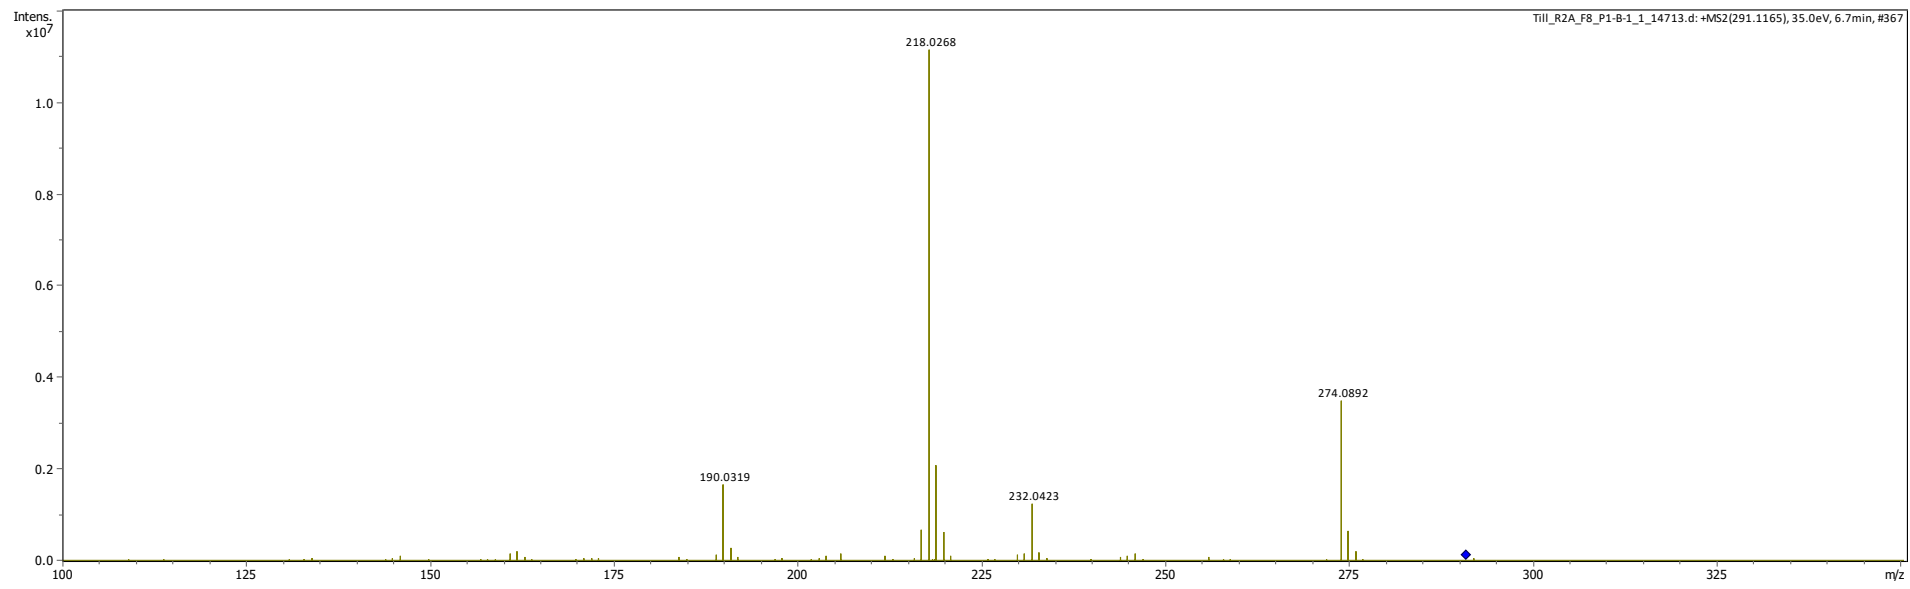

Figure S31: MS/MS spectrum of 6

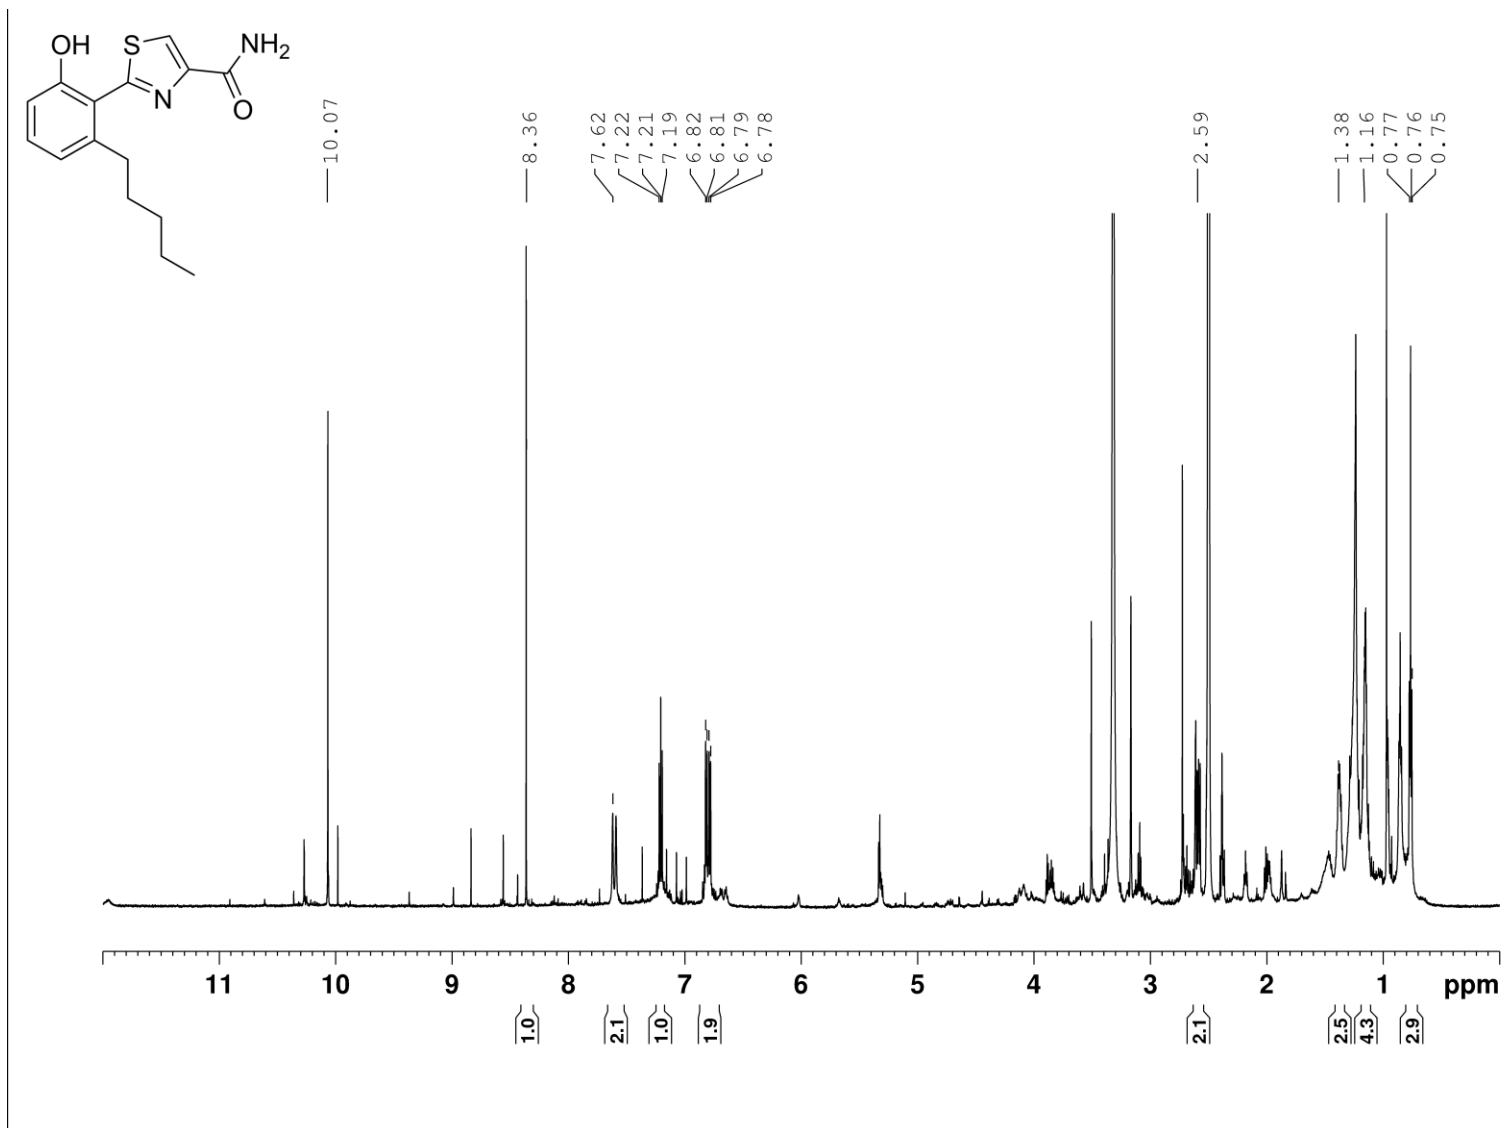

Figure S32: <sup>1</sup>H NMR spectrum of **6** (600 MHz, DMSO-*d*<sub>6</sub>, 25 °C)

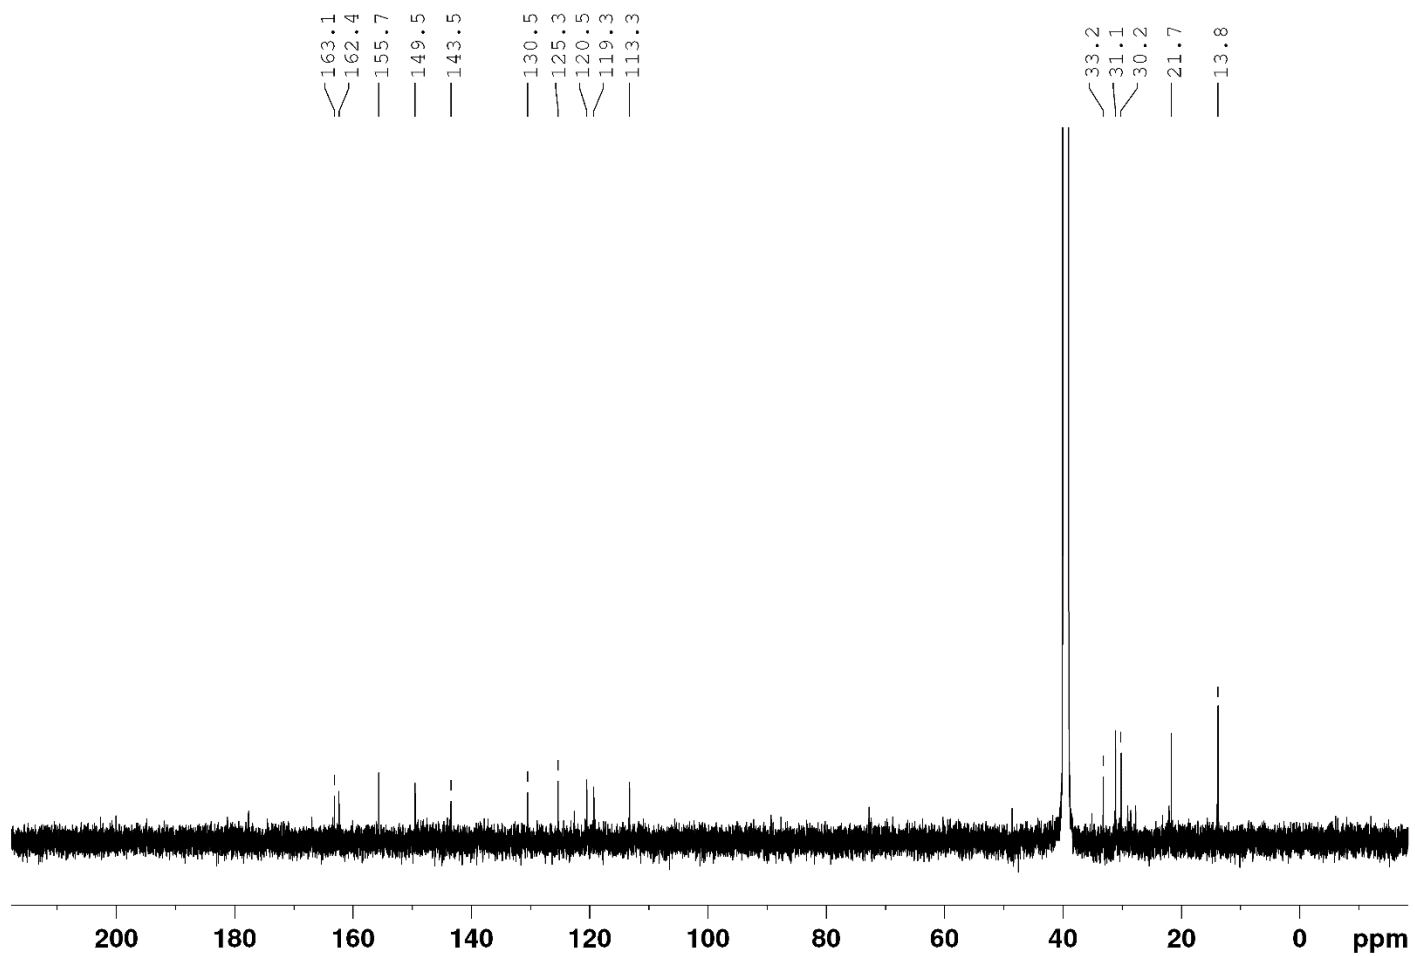

Figure S33:  $^{13}\text{C}$  NMR spectrum of **6** (150 MHz,  $\text{DMSO}-d_6$ , 25 °C)

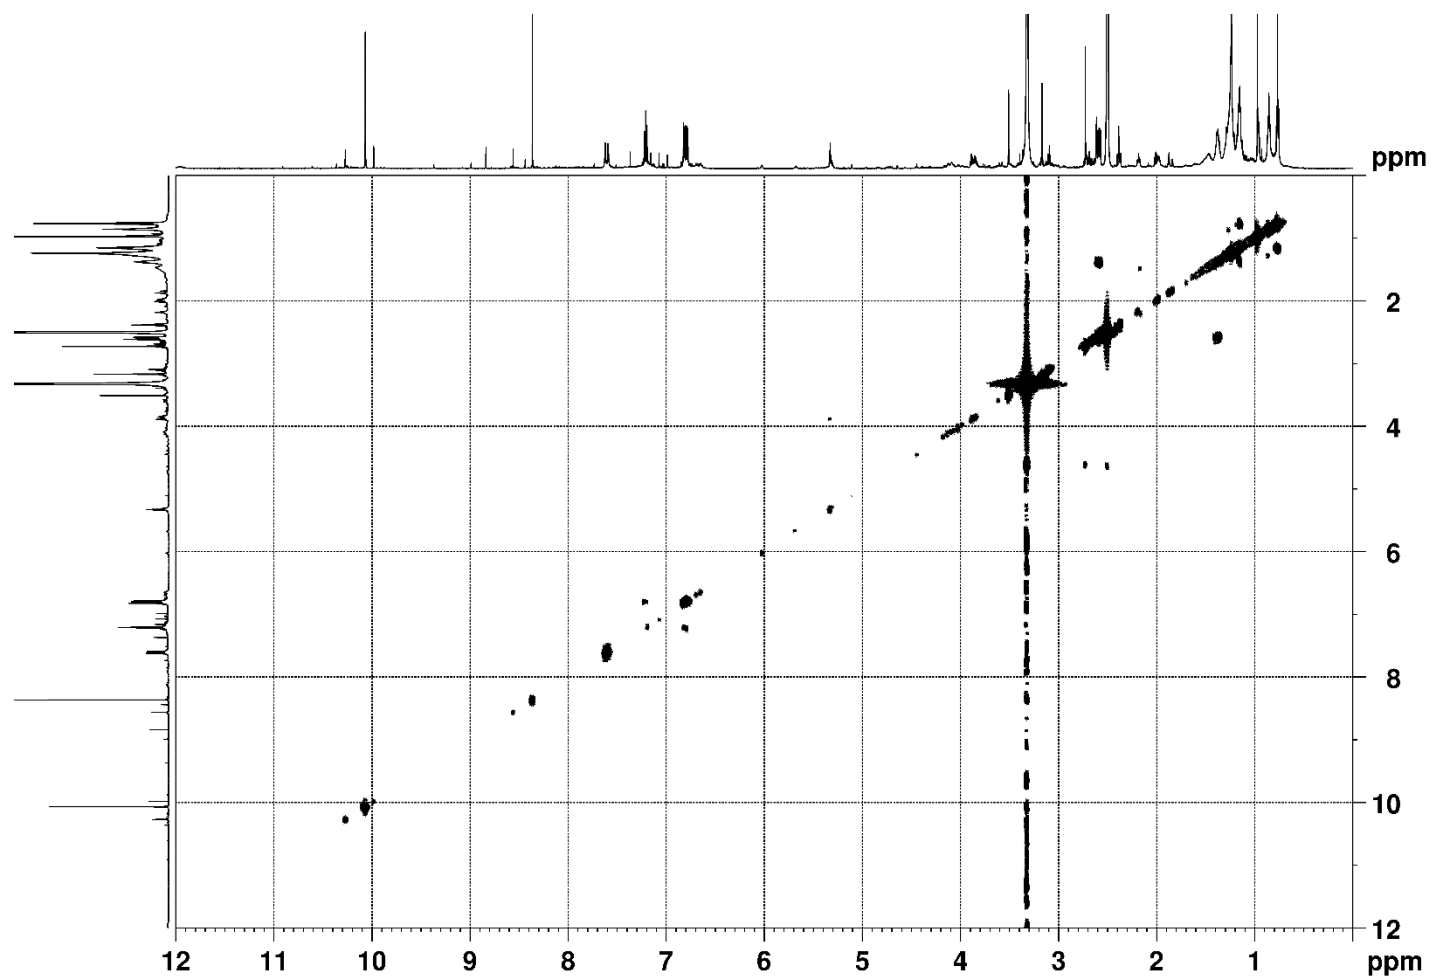

Figure S34: COSY spectrum of **6** (600 MHz, DMSO-*d*<sub>6</sub>, 25 °C)



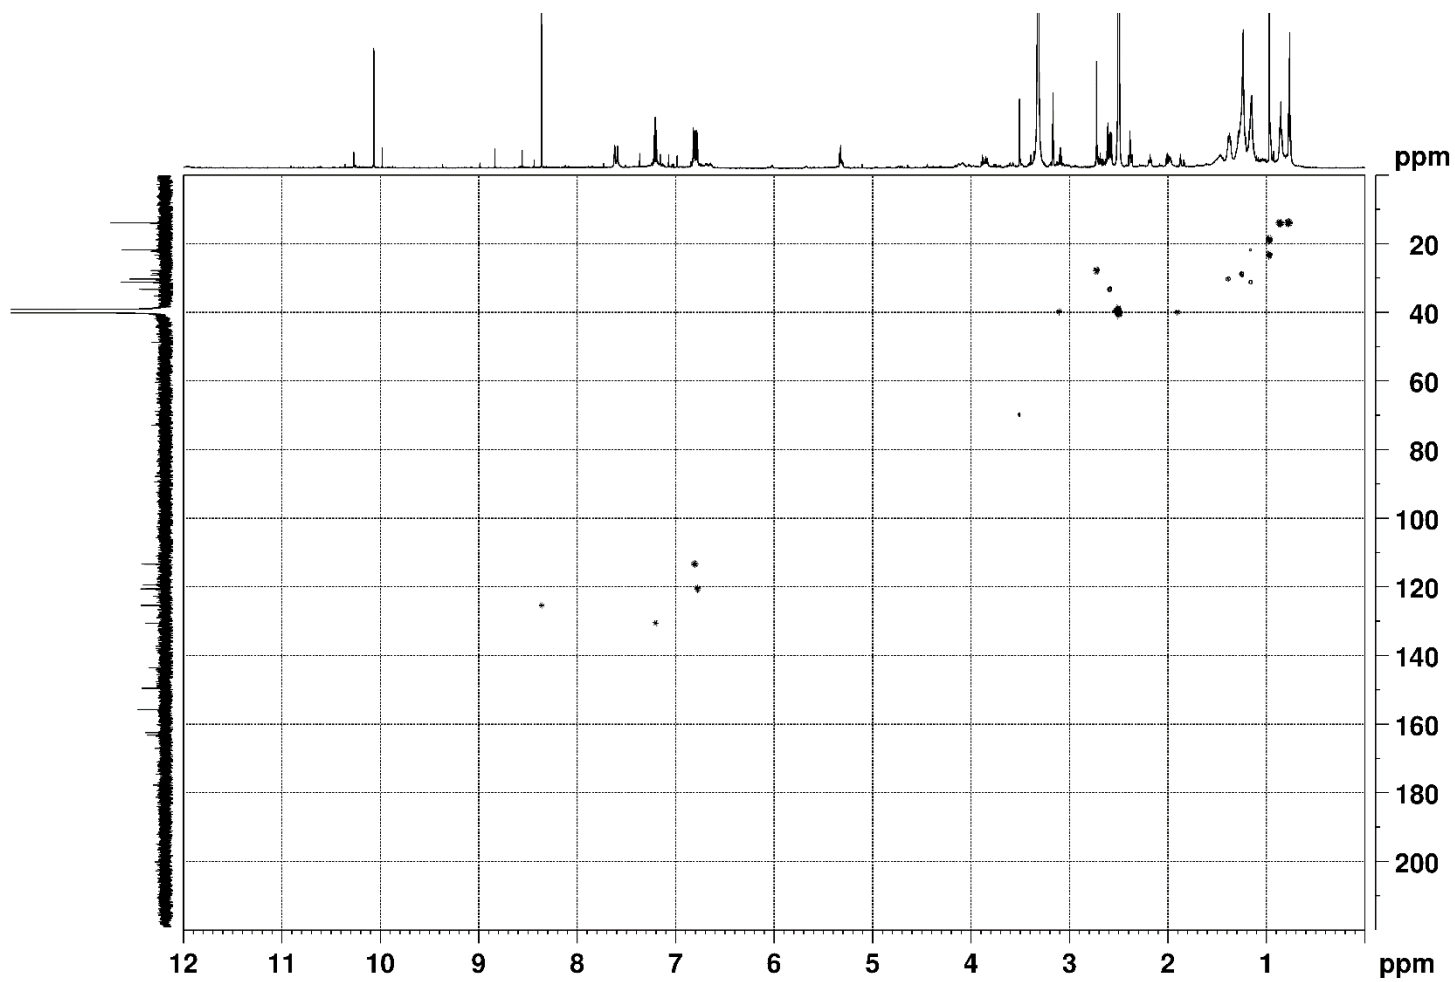

Figure S35: HSQC spectrum of **6** (600 MHz, DMSO- $d_6$ , 25 °C)

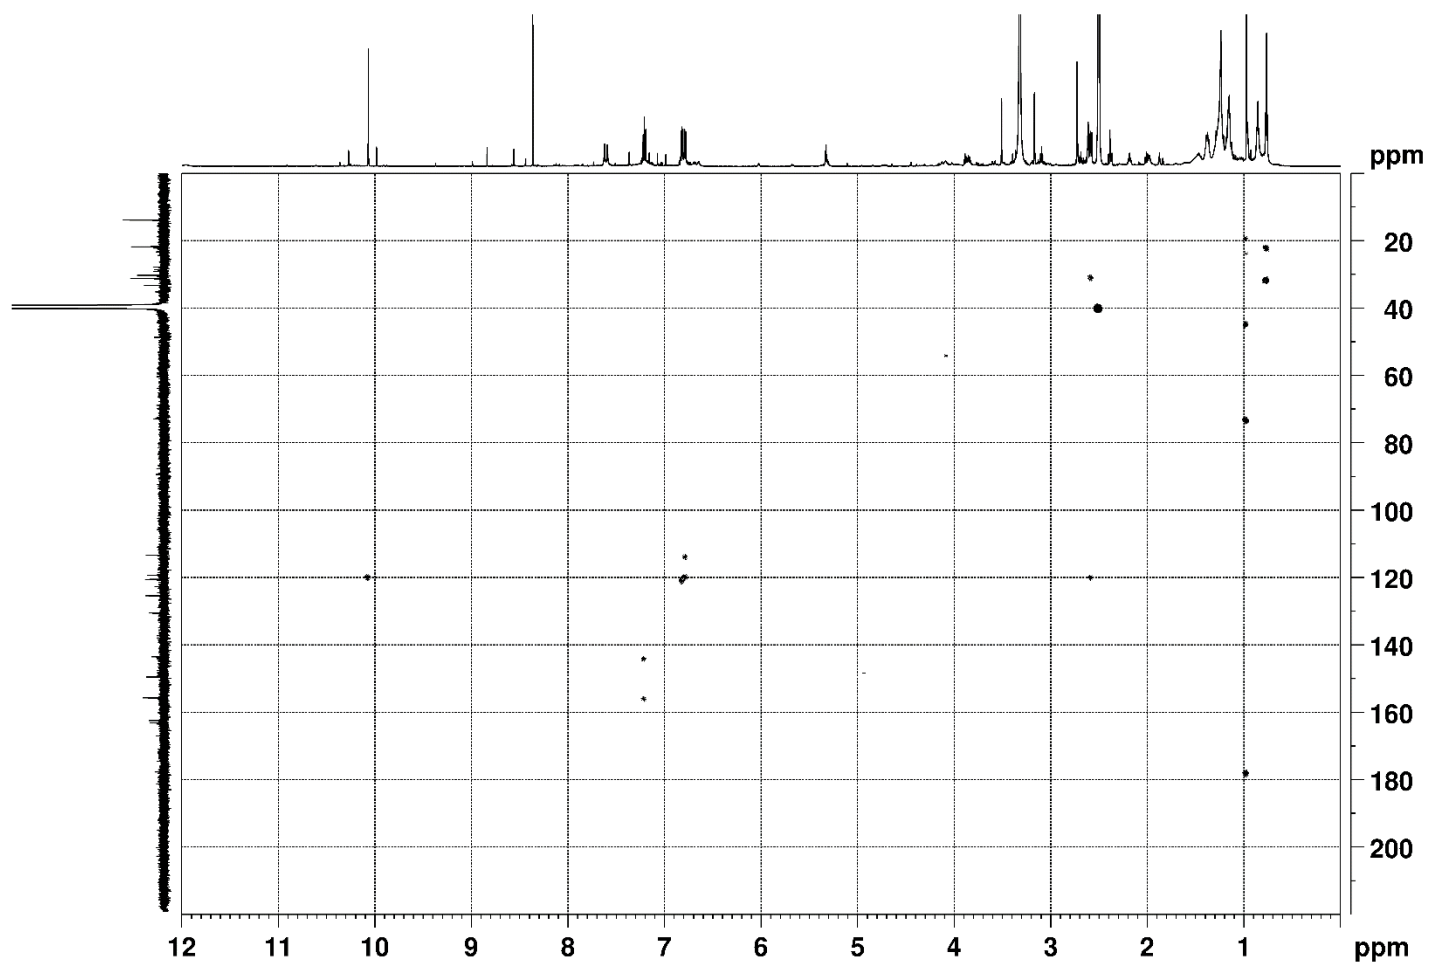

Figure S36: HMBC spectrum of **6** (600 MHz,  $\text{DMSO}-d_6$ , 25 °C)
